1 **Bivalent and Broad Chromatin Domains Regulate Pro-metastatic Drivers in**  
2 **Melanoma**

3 Christopher Terranova<sup>#,1</sup>, Ming Tang<sup>#,1,10</sup>, Mayinuer Maitituoheti<sup>#,1</sup>, Ayush T. Raman<sup>1,7,8</sup>,  
4 Jonathan Schulz<sup>1</sup>, Samir B. Amin<sup>1,6</sup>, Elias Orouji<sup>1,11</sup>, Katarzyna Tomczak<sup>1</sup>, Sharmistha  
5 Sarkar<sup>1</sup>, Junna Oba<sup>3</sup>, Caitlin Creasy<sup>3</sup>, Chang-Jiun Wu<sup>1</sup>, Dongyu Zhao<sup>9</sup>, Kaifu Chen<sup>9</sup>,  
6 Lauren E. Haydu<sup>5</sup>, Wei-Lien Wang<sup>2</sup>, Alexander J. Lazar<sup>2</sup>, Scott E. Woodman<sup>1,3,4</sup>,  
7 Chantale Bernatchez<sup>3</sup>, and Kunal Rai<sup>1,\*</sup>

8 <sup>1</sup> Department of Genomic Medicine, University of Texas MD Anderson Cancer Center,  
9 Houston, TX.

10 <sup>2</sup> Department of Pathology, University of Texas MD Anderson Cancer Center, Houston,  
11 TX.

12 <sup>3</sup> Department of Melanoma Medical Oncology, University of Texas MD Anderson Cancer  
13 Center, Houston, TX.

14 <sup>4</sup> Department of Systems Biology, University of Texas MD Anderson Cancer Center,  
15 Houston, TX.

16 <sup>5</sup> Surgical Oncology, University of Texas MD Anderson Cancer Center, Houston, TX.

17 <sup>6</sup> The Jackson Laboratory for Genomic Medicine, Farmington, CT.

18 <sup>7</sup> Epigenomics Program, Broad Institute of MIT and Harvard, Cambridge, MA.

19 <sup>8</sup> Graduate Program in Quantitative Sciences, Baylor College of Medicine, Houston, TX.

20 <sup>9</sup> Institute for Academic Medicine, Methodist Hospital Research Institute, Houston, TX.

21 <sup>10</sup> FAS informatics, Department of Molecular Biology, Harvard, Cambridge, MA

22 <sup>11</sup> Epigenetics Initiative, Princess Margaret Genomics Centre, Toronto, ON Canada

23 \*Corresponding Author: [krai@mdanderson.org](mailto:krai@mdanderson.org)

25 **ABSTRACT**

26 Chromatin deregulation is an emerging hallmark of cancer. However, the extent of  
27 epigenetic aberrations during tumorigenesis and their relationship with genetic  
28 aberrations are poorly understood. Using ChIP-sequencing for enhancers (H3K27ac and  
29 H3K4me1), promoters (H3K4me3), active transcription (H3K79me2) and polycomb  
30 (H3K27me3) or heterochromatin (H3K9me3) repression we generated chromatin state  
31 profiles in metastatic melanoma using 46 tumor samples and cell lines. We identified a  
32 strong association of NRAS, but not BRAF mutations, with bivalent states harboring  
33 H3K4me3 and H3K27me3 marks. Importantly, the loss and gain of bivalent states  
34 occurred on important pro-metastasis regulators including master transcription factor  
35 drivers of mesenchymal phenotype including *ZEB1*, *TWIST1*, *SNAI1* and *CDH1*.  
36 Unexpectedly, a subset of these and additional pro-metastatic drivers (e.g. *POU3F2*,  
37 *SOX9* and *PDGFRA*) as well as melanocyte-specific master regulators (e.g. *MITF*, *ZEB2*,  
38 and *TFAP2A*) were regulated by exceptionally wide H3K4me3 domains that can span  
39 tens of thousands of kilobases suggesting roles of this new epigenetic element in  
40 melanoma metastasis. Overall, we find that BRAF, NRAS and WT melanomas may use  
41 bivalent states and broad H3K4me3 domains in a specific manner to regulate pro-  
42 metastatic drivers. We propose that specific epigenetic traits – such as bivalent and broad  
43 domains – get assimilated in the epigenome of pro-metastatic clones to drive evolution of  
44 cancer cells to metastasis.

45

46

47

## 48 **Introduction**

49 Melanoma is a deadly disease with an estimated 96,000 new cases each year<sup>1-3</sup>. While  
50 targeted therapy and immunotherapy have become the standard of care with significant  
51 improvement in clinical response, more than 7,000 patients still succumb to this disease  
52 per year due to primary or acquired resistance<sup>4,5</sup>. Therefore, it is critical to gain a deeper  
53 understanding of the disease biology to design more effective therapies.

54 Large scale efforts from consortiums such as The Cancer Genome Atlas (TCGA)  
55 have provided deeper understanding of molecular aberrations in the disease<sup>6-8</sup>. These  
56 studies identified critical somatic mutations in this disease that likely occur due to UV  
57 exposure. Among these, somatic mutations in important *bona fide* oncogenes and tumor  
58 suppressors, such as BRAF, NRAS, NF1, INK/ARF, PTEN and TP53, have been  
59 demonstrated to be well-chronicled drivers of this malignancy<sup>6-8</sup>. One of the important  
60 findings from these studies were genetic aberrations in several key epigenetic regulators  
61 such as EZH2, IDH1/2, ARID2, KMT2C and KMT2D<sup>6-8</sup>. Many of these proteins are  
62 enzymes that regulate covalent modifications of histones<sup>7,9-13</sup>. Although recent studies  
63 provide insight into the correlation of isolated histone marks, there are a myriad of  
64 possible combinatorial patterns of histone modifications, and it is these combinatorial  
65 states - not individual modifications - that dictate epigenetic status of associated genomic  
66 loci<sup>14-16</sup>. These observations suggest that epigenetic alterations, including those in  
67 histone modifications, may play important roles in melanomagenesis. Indeed, specific  
68 functional roles have been assigned to some of these players as well as histone variants  
69 such as macroH2A and H2A.z in melanomas<sup>17,18</sup>. In addition, our previous study showed  
70 alterations in specific chromatin states during transition from pre-malignant to malignant  
71 phenotype in melanoma<sup>19</sup>.

72           These studies provide strong rationale for a systematic mapping of epigenome to  
73 obtain comprehensive understanding of epigenetic elements that may act as driver events  
74 in specific melanoma tumors. This concept has been epitomized by the DNA methylation  
75 profiles in large number of tumors by the TCGA study which has provided key concepts  
76 about roles of this important epigenomic mark in cancer progression<sup>11</sup>. For example, a  
77 subset of cancer types are demonstrated to harbor hypermethylation phenotype, termed  
78 CpG Island Methylation Phenotype, which associated with mutations in IDH1/2 genes<sup>11</sup>.  
79 Chromatin state mapping in large number of tumors has the potential to identify similar  
80 concepts<sup>20</sup>. Furthermore, several projects such as ENCODE and Roadmap Epigenomics  
81 have cataloged extensive histone modification in normal human tissues and cell lines  
82 which allows for identification of cancer specific alternations in chromatin states<sup>21,22</sup>. Since  
83 epigenetic aberrations are reversible by targeting of their enzyme regulators, the  
84 chromatin mapping efforts are likely to identify potentially novel therapeutic strategy in  
85 specific genetic context. For example, our previous study suggested that HDAC inhibitors  
86 could be a good strategy to block pre-malignant to malignant transition in melanoma<sup>19</sup>.

87           In this study, we present a comprehensive chromatin state analysis of metastatic  
88 melanoma in 46 tumor samples (profiled by TCGA) and cell lines (Profiled by Cancer Cell  
89 Line Encyclopedia (CCLE) or internal efforts at MD Anderson) by performing ChIP-  
90 sequencing of 6 histone modification marks. Overall, investigation revealed a mechanism  
91 in which alterations of distinct chromatin states, including bivalent and exceptionally wide  
92 H3K4me3 and H3K27me3 domains, regulate key drivers of a mesenchymal/invasive  
93 phenotype, a network of genes that includes master transcription factors and melanocyte-  
94 specific regulators. Together, this study encompasses the most complete description

95 regarding the epigenetic circuitry governing melanoma metastasis that can serve as an  
96 important resource for advancing the understanding of the melanoma epigenome.

97

98

99

100

101

102

## 103 **Results**

### 104 **Bivalent polycomb repressive chromatin domains distinguish metastatic** 105 **melanoma tumors based on mutational subtypes.**

106 Chromatin state profiling remains a powerful tool for determining the regulatory status of  
107 annotated genes and identifying novel elements in non-coding genomic regions<sup>3,4</sup>. Using  
108 ChIP-sequencing for enhancers (H3K27ac and H3K4me1), promoters (H3K4me3), active  
109 transcription (H3K79me2) and polycomb (H3K27me3) or heterochromatin (H3K9me3)  
110 repression coupled with tissue-matched mutation, transcriptomic and methylation data,  
111 we describe the cis-regulatory landscape across 46 melanoma samples. These  
112 constituted 20 metastatic melanoma tumors (profiled by the TCGA study<sup>6</sup>), 10 patient-  
113 derived melanoma short term cultures (passage n < 10; profiled by internal effort at MD  
114 Anderson; manuscript in preparation) and 16 established melanoma lines profiled by the  
115 Cancer Cell Line Encyclopedia/Sanger (CCLE)<sup>23</sup> (Supplementary Table 1). Using our  
116 primary cohort of 20 metastatic melanoma tumor samples we computed multiple  
117 chromatin state models (8-states through 30-states) with the ChromHMM algorithm (Fig.  
118 **1a** and Supplementary Fig. **1a**). We chose an 18-state model because it is large enough  
119 to identify important functional elements while still being small enough to interpret easily.  
120 This model includes active (E1) and transcribed promoters (E2), harboring high levels of  
121 H3K4me3, H3K27ac, H3K4me1 without (E1) and with H3K79me2 (E2) within the TSS or  
122 TSS flanking regions (Supplementary Fig. **1b**); transcribed genes (E3 and E4); genic (E5,  
123 E6) and active enhancers (E7, E8) harboring high levels of H3K27ac and H3K4me1 with  
124 concomitant enrichment of H3K79me2 within (E5-E6) or outside (E7-E8) the TSS  
125 flanking regions; and heterochromatic (E10) or polycomb (E14) based repression

126 harboring high levels of either H3K9me3 (E10) or H3K27me3 (E14) respectively. In  
127 addition, we also observed two prominent bivalent/poised states: first, harboring both  
128 H3K4me3 and high levels of H3K9me3 (E12, annotated as “bivalent H3K9me3”), and  
129 second, H3K4me3 and high levels of H3K27me3 (E13, annotated as “bivalent  
130 H3K27me3”). Overall, the chromatin state profiles in metastatic melanoma tumors are  
131 associated with both gene expression patterns and DNA methylation levels (Fig. **1b, c**).  
132 As expected, active promoters (E1 and E2) are associated with high levels of gene  
133 expression and low levels of methylation, whereas repressed states (E12 and E13) are  
134 associated with low levels of gene expression and high levels of methylation (Fig. **1b, c**).  
135 Consistent with the previous Roadmap epigenome analysis<sup>21,22</sup> in normal samples, DNA  
136 methylation patterns also showed some dynamic patterns. For example,  
137 hypermethylation in active chromatin states E3 through E8 are also associated with high  
138 levels of transcriptional activation (Fig. **1b, c**).

139 This TCGA tumor cohort is inclusive of multiple melanoma subgroups<sup>6</sup>, including  
140 mutation subtypes (BRAF, NRAS, WT), transcriptomic subtypes (Immune, Keratin, MITF-  
141 low) and DNA-methylation subtypes (CpG, Hypermethylated, Hypomethylated, Normal).  
142 Before comparing chromatin state data and molecular subtypes, we first ensured the  
143 generated ChIP-seq profiles could be uniquely mapped to the specific donor through CNV  
144 analysis. In 18 of 20 tumors, the CNV analysis from ChIP-seq data correlated with the  
145 CNV classification from TCGA (Supplementary Fig. **1c, d**). Projection of chromatin state  
146 data using Multidimensional Scaling (MDS) analysis revealed chromatin state E13  
147 (bivalent state containing high levels of H3K27me3 and H3K4me3 and modest  
148 enrichment of H3K9me3) was able to separate NRAS-mutant melanoma tumors from

149 BRAF-mutants and WT samples in the first dimension (Fig. **1d, e** and Supplementary Fig.  
150 **1e**). Moreover, differential analysis of bivalent chromatin states (E12 and E13) between  
151 mutational subtypes (BRAF vs NRAS vs WT) demonstrated NRAS-enrichment specific  
152 to bivalent H3K27me3 high (Fig. **1f-h** and Supplementary Fig. **2a-c**). Together, this data  
153 suggested that a substantial number of genomic loci in melanoma tumors harbor bivalent  
154 chromatin states. To determine whether this could be a reflection of tumor heterogeneity,  
155 we assessed the presence of these bivalent chromatin states in 10 melanoma short-term  
156 cultures (MSTC) and 16 commercially available cell lines from CCLE (Supplemental  
157 Table **1**), allowing us to eliminate the possibility of signals emerging from other cell types  
158 in the tumor microenvironment. Using Model Based Analysis of ChIP-seq (MACS), we  
159 identified all potential bivalent combinations by directly overlapping H3K4me3 peaks with  
160 either H3K27me3 peaks (bivalent H3K27me3), H3K9me3 peaks (bivalent H3K9me3) or  
161 H3K27me3 peaks + H3K9me3 peaks (bivalent H3K4/H3K9/H3K27me3) in each  
162 individual sample. Bivalent loci were further identified as “common” in tumors and cell  
163 lines if they were present in ~50% of the samples in each subgroup (BRAF = 7/13, NRAS  
164 = 2/4, WT = 2/3, MSTC = 5/10 and CCLE = 8/16). In accordance with our chromatin state  
165 analysis, NRAS-mutants displayed the greatest number of bivalent H3K27me3 loci out of  
166 all the subgroups whereas WT samples displayed the least number of bivalent loci (Fig.  
167 **1i** and Supplementary Fig. **2d**). Importantly, both the MSTC and CCLE subgroups also  
168 displayed a large number of bivalent H3K27me3 loci that were shared with melanoma  
169 tumors (Fig. **1i, j** and Supplementary Fig. **2e-g**), further suggesting these domains are  
170 enriched in cancer cells and are not a product of tumor heterogeneity.

171



172 **Bivalent domains are lost and gained on key mesenchymal genes in metastatic**  
173 **melanoma.**

174 In embryonic stem cells (ESCs), bivalent promoters mark critical lineage-specific genes  
175 which gain or lose these modifications as cells differentiate towards a particular  
176 phenotype<sup>24,25</sup>. Previous studies have demonstrated various cancer-related genes (i.e.  
177 CDKN2A) maintain or regain bivalent promoters in normal tissues, however their role in  
178 cancer progression has yet to be described<sup>26</sup>. To this end, we first computed unique  
179 bivalent loci (H3K4me3 and H3K27me3) in BRAF-mutant, NRAS- mutant and WT  
180 samples by overlapping common peaks in each tumor subtype which further suggested  
181 NRAS-mutants contained the highest number of bivalent loci (Fig. **2a** and Supplementary  
182 Fig. **3a-c**). To determine how subtype-specific bivalent polycomb losses and gains  
183 influence melanoma progression, we calculated the overlaps of bivalent sites from NRAS-  
184 and BRAF- mutants to those in primary melanocytes (Fig. **2b, c** and Supplementary Fig.  
185 **3d, e**). We focused primarily on the comparisons between NRAS- and BRAF-mutants as  
186 most significant differences in bivalency were observed to occur between these  
187 subgroups (Fig. **1f-i**). We posited that removal of H3K27me3 mark from bivalent loci in  
188 melanocytes would lead to transcriptionally 'active' loci in melanoma tumors and such loci  
189 were termed under "bivalent losses" (Fig. **2d**). Similarly, gain of H3K27me3 mark on loci  
190 (bivalent in tumors) that harbor only H3K4me3 in melanocytes will lead to transcriptional  
191 repression which were termed as "bivalent gains" (Fig. **2d**). Determination of the gene  
192 targets (within +/- 10KB of each locus) and subsequent pathway enrichment analyses by  
193 GSEA MSigDB tool identified critical melanoma-associated "hallmark pathways" within  
194 each genetic subgroup (Fig. **2e**). For example, in NRAS-mutants, losses of melanocyte-

195 specific bivalency included genes associated with the “epithelial-mesenchymal transition”  
196 and “KRAS-signaling up”, while gains of tumor-specific bivalency included genes  
197 associated with “KRAS-signaling down” and “apical junction” (Fig. **2e** and Supplementary  
198 Table 2). Furthermore, RNA-seq analysis between NRAS-mutant (n = 81) and BRAF-  
199 mutant (n = 118) TCGA SKCM tumors confirmed “epithelial-mesenchymal transition” and  
200 “KRAS-signaling up” signatures to be upregulated specifically in NRAS-mutant samples  
201 (Fig. **2f** and Supplementary Table 3), demonstrating an association between shifts in  
202 bivalent domains and gene expression patterns within critical melanoma pathways.  
203 Indeed, apart from obvious activation of RAS pathway genes, previous studies have  
204 demonstrated importance of activation of mesenchymal drivers and phenotypes in  
205 invasive behavior of metastatic melanoma and other malignancies<sup>27-29</sup>.

206 In order to identify important metastasis driver genes that are subjected to  
207 epigenetic regulation, we focused on genes that do not harbor genetic changes in  
208 cancers, which included key EMT transcription factors (EMT-TF) *ZEB1*, *TWIST1*, *SNAI1*  
209 and *CDH1* (Fig. **2e** and Supplementary Fig. **3f**). In response to activation of NRAS or  
210 BRAF, the EMT-TF network undergoes a reorganization that includes activation of *ZEB1*  
211 and *TWIST1* along with the loss of *CDH1*. This phenomenon is accompanied with  
212 increased invasion and correlates with poor prognosis in metastatic melanoma patients<sup>28</sup>.  
213 We observed that *ZEB1*, *TWIST1*, and additionally *SNAI1* and *TGFBI* are held in a  
214 bivalent state in melanocytes and transition to an active state in metastatic melanoma  
215 tumors, which occurs in a subtype specific manner (Fig. **2g** and Supplementary Fig. **3g**).  
216 Importantly, these events are significantly correlated with their mRNA expression levels  
217 (Fig. **2h** and Supplementary Fig. **3h**). In addition, genes such as *CDH1* and *CDH3*

218 harbor H3K4me3 in melanocytes and gain repressive bivalency in both NRAS-mutant and  
219 BRAF-mutant tumors subtypes (Fig. 2i). This transition to repressive bivalency is  
220 associated with their downregulation (Fig. 2j). Interestingly, *ZEB1* and *TWIST1* harbored  
221 bivalent chromatin states in embryonic stem cells and germ-layer stem cells, but not in  
222 mesenchymal stem cells where they are active (Supplementary Fig. 4a-d). Various other  
223 tissues such as breast (*TWIST1* and *ZEB1*<sup>30,31</sup>), brain (*TWIST1* and *ZEB1*), colon  
224 (*TWIST1*), lung (*TWIST1*) and ovarian (*TWIST1*) normal tissues or cell lines  
225 (Supplementary Fig. 4a-d) showed varying degree of bivalency which correlated well with  
226 gene expression patterns demonstrating this “bivalent loss” mechanism can be expanded  
227 to various other tissues. In addition to EMT-TF, we observed bivalent shifts on several  
228 well-characterized drivers of melanoma metastasis, such as *BMI1*<sup>32</sup>, *RNF2*<sup>33</sup>, and *CDK6*<sup>17</sup>  
229 (Supplementary Fig. 3i-k), further strengthening the hypothesis that shifts in bivalent  
230 domain can be a key epigenetic event during metastasis.

231

232 **Melanocyte-specific bivalent genes transition to transcriptionally active broad**  
233 **H3K4me3 in melanoma tumors.**

234 While surveying the transitions of bivalent domains to a transcriptionally active state  
235 through the genome, we observed two distinct types of H3K4me3 profiles present in many  
236 of the samples. For example, the *TWIST1* domain spanned well beyond the gene body  
237 whereas the *ZEB1* domain was localized within the promoter region (Fig. 2g and  
238 Supplemental Fig. 4a, b). In contrast to typical H3K4me3 domains that are usually 200-  
239 1000bp long, broad H3K4me3 domains can span thousands of kilobases and have been  
240 implicated in various cellular processes, including increased gene expression, enhancer

241 activity and tumor-suppressor gene regulation<sup>34-36</sup>. Hence, we posited that some  
242 important driver genes that lose bivalency in melanocytes may retain or gain different  
243 types (broad or non-broad) of H3K4me3 domains in melanoma tumors.

244 Hence, we systematically identified broad H3K4me3 domains by computing the  
245 overall width and density from MACS2 broad peaks in BRAF-mutant, NRAS-mutant and  
246 WT tumors (Fig. **3a-c**). Globally, NRAS-mutant and BRAF-mutant subtypes harbored the  
247 largest number of broad H3K4me3 peaks, in some cases spanning >30kb in NRAS-  
248 tumors (Fig. **3b**). Similarly, the top 1% broadest domains in these subtypes extended well  
249 beyond the typical H3K4me3 domain (200-1000bp), with peaks reaching over 4kb in  
250 10/17 the individual samples profiled (Fig. **3d**). In contrast, WT samples harbored much  
251 shorter H3K4me3 domains with the widest peaks spanning around 15kb (Fig. **3c**). Here,  
252 the top 1% broadest peaks did not markedly extend beyond the typical H3K4me3 domain,  
253 with only 1/3 samples harboring peaks over 4kb at this percentage cutoff (Fig. **3d**). Based  
254 on these observations and previous reports, broad domains were defined as peaks that  
255 extended at least 4x ( $\geq 4$ kb; merge size = 1kb) beyond that of typical H3K4me3 domain  
256 (Fig. **3d** and Supplementary Fig. **5a**). Using this method, we identified two distinct types  
257 of H3K4me3 in melanoma tumors including broad domains ( $\geq 4$ kb) spanning outside of  
258 the TSS (mean length = 12.3kb) and non-broad domains (< 4kb) localized within the  
259 promoter region (mean length = 2.2kb) (Fig. **3e-f** and Supplementary Fig. **5b**). GSEA  
260 analysis suggested occurrence of broad domains on genes regulating important biological  
261 processes implicated in melanoma metastasis and tumorigenesis, such as “TNFA  
262 signaling via NFKB”<sup>37</sup>, “WNT signaling”<sup>38,39</sup>, and Hedgehog signaling”<sup>40-42</sup> (Fig. **3g-i** and  
263 Supplemental Table **4**), further suggesting a role for broad domains in melanoma

264 metastasis. Additionally, important melanoma drivers such as *NEAT1*, *MALAT1*, *MYC*  
265 and *EVX1* harbored broad H3K4me3 domains in and around their gene bodies (Fig. **3j**).

266 To identify the subsets of melanocyte-specific bivalent genes that transition to  
267 transcriptionally active broad domains (and lose H3K27me3 in tumors), we further  
268 overlapped genes that harbor 1) bivalent domains uniquely in melanocytes (but not in  
269 tumors), 2) tumor-specific broad or non-broad H3K4me3 domains, 3) active transcription  
270 mark H3K79me2 and 4) gene expression [using RNA-seq data from NRAS (n=81), BRAF  
271 (n=118) and WT (n=38) metastatic samples]. Integrative analysis revealed NRAS-specific  
272 broad domains were associated with increased gene expression (Fig. **4a,b** and  
273 Supplemental Table **5**) and enriched for melanoma pathways such as "UV response up",  
274 "KRAS signaling up" and "Glycolysis" (Fig. **4c**). Genes displaying the transition to  
275 transcriptionally active broad H3K3me3 included additional metastatic drivers known to  
276 function in the switch to an mesenchymal/invasive state, including *SOX9*, *POU3F2*,  
277 *PDGFRA* and *MYCN* (3.7kb width) (Fig. **4d, f**). While we also identified a broad  
278 H3K4me3-associated increase of transcription in WT samples, this occurred on a  
279 markedly lower number of genes many of which were shared with NRAS samples (Fig.  
280 **4a, b**). In contrast to broad domains, we identified a relatively large and constant number  
281 of genes transitioning from a bivalent state to non-broad H3K4me3 in melanoma tumors,  
282 many of which were present within all mutational subtypes (Fig. **4a**). On a global level,  
283 we did not observe a change in the mean expression levels of melanocyte-specific  
284 bivalent genes that transitioned to non-broad H3K4me3 domains in any melanoma  
285 subtype (Fig. **4b**), however, gene expression changes in specific genes were noted.  
286 These included various genes known to be misregulated upon the aberrant activation of

287 RAS/RAF signaling, including *VCAN* as well as various RAS-effectors such as  
288 *RASGEF1B*, *RASEF*, *RASGRP1*, *RAPGEF5*, and *ARHGAP27* (Fig. **4e, g** and  
289 Supplementary Fig. **5c-e**), Overall, these results suggest that melanocyte-specific  
290 bivalent losses that transition to broad H3K4me3 domains in NRAS-mutant tumors  
291 regulate/increase the expression of mesenchymal/invasive drivers during metastatic  
292 progression.

293

294 **Broad H3K4me3 domain spreading is associated with increased transcriptional**  
295 **activation.**

296 Our results suggest that during the transition from a bivalent to an active state, genes that  
297 retain broad H3K4me3 domains are associated with increased transcriptional activation  
298 compared to non-broad domains in melanoma tumors (Fig. **4a-c**). However, this was only  
299 observed on a small subset of genes (NRAS = 97; Supplementary Table 5). We  
300 considered that another mechanism of gene activation could be spreading of the  
301 H3K4me3 signal, while gene repression may be associated with shortening of the broad  
302 H3K4me3 domains. Indeed, a previous report demonstrated that H3K4me3 domain  
303 shortening is associated with decreased gene expression of tumor suppressor genes in  
304 lung and liver cancers<sup>36</sup>. Therefore, we investigated whether the size of H3K4me3  
305 domains are altered in metastatic melanoma. First, on a genome-wide level, we observed  
306 preferential shortening ( $\leq 2$ kb) of all H3K4me3 peaks in melanoma tumors relative to  
307 melanocytes (Fig. **5a**). Focusing on the promoter-associated broad H3K4me3 peaks (-  
308 /+10kb TSS), we further observed preferential shortening ( $\leq 2$ kb) of these peaks in  
309 melanoma tumors which was associated with a decrease in gene expression levels (Fig.

310 **5b-d** and Supplemental Table **6**). Promoters harboring some of the broadest H3K4me3  
311 domains displayed marked shortening on critical components of the melanocyte  
312 regulatory network in melanoma tumors, including *PMEL* (aka *GP100*), *MITF*, *ZEB2* and  
313 *TFAP2A*<sup>43</sup> (Fig. **5e** and Supplementary Fig. **6a, b**). Because genes such as *MITF* and  
314 *ZEB2* are differentially expressed in alternate phenotypic states, displaying high  
315 expression in melanocytes (or proliferative phenotype) and low expression in melanoma  
316 tumors<sup>28,44</sup> (Fig. **5f** and Supplementary Fig. **6c**), this finding illustrates a new epigenetic  
317 mechanism for their misregulation in metastatic melanoma. Similar to that of bivalent  
318 losses, we also identified a smaller subset of promoters that gained broad H3K4me3 in  
319 melanoma tumors. The top promoters displaying a broad H3K4me3 transition ( $\geq 10$ kb,  
320 29 genes) were enriched for critical developmental regulators including *DLX1/2*, *TBX3*,  
321 *HMX2/3* and *LBX1*, many of which were also upregulated in metastatic melanoma tumors  
322 and hence suggest potential oncogenic roles for these proteins (Fig. **5g, h** and  
323 Supplementary Fig. **6d, e**). Together, these results suggest broad H3K4me3 domains are  
324 associated with higher expression that decreases upon shortening on key melanocyte-  
325 specific promoters during the transition to metastatic melanoma.

326

### 327 **Broad H3K27me3 domains display preferential lengthening in metastatic** 328 **melanoma.**

329 Another possible transition of bivalent domains is the loss of H3K4me3 and retention or  
330 extension of H3K27me3 domains. Therefore, we identified H3K27me3 domains by  
331 computing overall width and density from MACS2 broad peaks in BRAF-mutant, NRAS-  
332 mutant and WT samples (Supplementary Fig. **7a-c**). In all subtypes, we observed

333 exceptionally wide H3K27me3 domains spanning tens of thousands of kilobases with  
334 multiple peaks extending well over 100kb in BRAF- and NRAS-mutant samples  
335 (Supplementary Fig. **7a-c**). Globally, the top 1% broadest H3K27me3 domains in 14/20  
336 tumors extended well over 10kb (Fig. **6a** and Supplementary Fig. **7e**; merge size = 1kb).  
337 In contrast to the results for H3K4me3, we observed preferential lengthening of  
338 H3K27me3 domains on a global level ( $\geq 2$ kb) in BRAF-, NRAS- mutants and WT samples  
339 (Fig. **6b**). However, since H3K27me3 is already known as a broad mark, we focused on  
340 promoter regions that displayed large extensions or constrictions ( $\geq 10$ kb) of H3K27me3  
341 domains. Although we observed relatively consistent number of broad ( $\geq 4$ kb)  
342 H3K27me3-associated promoters across mutational subtypes (Fig. **6c**), each subtype  
343 displayed a different pattern of H3K27me3 in comparison to melanocytes, with NRAS-  
344 and BRAF- mutant samples displaying preferential lengthening and WT preferential  
345 shortening (Fig. **6d**). Importantly, melanocytes harbored much shorter broad H3K27me3  
346 domains (~50kb) compared to all tumors (Supplemental Fig. **7d**), While the largest  
347 constriction of H3K27me3 was just over 50kb, the largest extension spanned over 100kb  
348 in BRAF- and 85kb in NRAS- mutant samples (Supplemental Table **7**), further indicating  
349 polycomb domains are exceptionally broad in melanoma tumors. Overall, the widest  
350 H3K27me3 domain lengthening observed was on the *HOXC* locus spanning 102.8kb in  
351 BRAF samples (Fig. **6e**). Interestingly, as 3' *HOX* genes are known to be expressed first  
352 during normal development, we observed H3K27me3 spreading specifically towards the  
353 3' end of the *HOXC* cluster in melanoma tumors. This 5' -> 3' H3K27me3 spreading was  
354 also observed on other *HOX* cluster genes (*HOXB/HOXD*) and further associated with  
355 the downregulation of various 3' members relative to melanocytes (Fig. **6f-h** and



356 Supplementary Fig. **7f, g**). Together, this exceptionally wide H3K27me3 spreading  
357 illustrates a new epigenetic signature for gene silencing of critical regulatory genes in  
358 metastatic melanoma.

359

360

361

362

363

## 364 Discussion

365 Our study describes an epigenetic program for reorganization of an interconnected  
366 regulatory network encompassing EMT-TF, melanocyte master regulators and  
367 mesenchymal/invasive genes as melanocytes progress to metastatic melanoma. Our  
368 work provides three major advances regarding the role of the epigenome in melanoma  
369 metastasis: 1) Specific genetic events such as BRAF or NRAS mutations may utilize  
370 specific chromatin states to bring about transcriptional changes unique that genotype. 2)  
371 Chromatin state switches involving bivalent domains mark master regulatory genes  
372 associated with a metastatic phenotype, including the epithelial-to-mesenchymal  
373 transition. 3) In addition to bivalent domain switches, contraction or extension of broad  
374 H3K4me3 and H3K27me3 domains may be a key driver in the regulation of pro-metastatic  
375 genes. In addition to these findings, the current study encompasses the most  
376 comprehensive dataset from a large number of well-annotated samples which can help  
377 the community better understand the epigenetic circuitry governing melanoma  
378 metastasis.

379 Our results suggest that assimilation of epigenetic traits may be critical to evolution  
380 of metastatic clones, consistent with some prior studies<sup>17,45</sup>. It has been argued that  
381 evolution of cancer cells through metastasis entails constant acquisition and switching of  
382 cellular phenotypes during its journey from the primary site to colonization in a distant  
383 organ<sup>46</sup>. Hence, the molecular processes governing metastasis may mirror those driving  
384 tissue differentiation during normal development. At the same time, those molecular traits  
385 that allow establishment/evolution of neo-phenotypes, such as the ones in play during  
386 selection of *crossweinless* phenotype observed by Waddington many decades ago<sup>47</sup>,

387 may also play an important driver role in evolution of cells undergoing metastasis.  
388 Waddington's "genetic assimilation" model suggested that specific traits (genetic or  
389 epigenetic) driving a cell towards a specific differentiation state in response to certain  
390 environmental pressure are assimilated in the genome (or epigenome) during evolution.  
391 Similarly, we propose that during evolution of cancer cells to metastasis, under selective  
392 environmental pressure specific cell clones assimilate epigenetic traits – such as shifts in  
393 bivalent and broad domains – in their genome which eventually help them disseminate  
394 and colonize distant organs.

395 In ESCs, bivalent promoters mark critical lineage-specific genes which gain or lose  
396 these modifications as cells differentiate towards a particular phenotype<sup>24,25</sup>. Moreover,  
397 various cancer-related genes maintain or regain bivalent promoters in normal tissues<sup>26</sup>.  
398 Here, we expand on those studies by demonstrating that bivalent domains are lost and  
399 gained on critical EMT-TF, melanoma-specific drivers and mesenchymal genes as  
400 melanocytes progress to metastatic melanoma. Shifts from bivalent states to active or  
401 repressive marks are likely the least energy-intensive route to gene activation or  
402 repression respectively (<https://doi.org/10.1101/456525>). Since metastasis involves  
403 several cell fate transitions, which likely employ transcriptional circuitry consisting of  
404 multiple genes, energetically the use of shifts involving bivalent chromatin states would  
405 be favored as the preferred mode of gene regulation. It can be suggested that this specific  
406 epigenetic process could constitute one of the primary 'forces' that can help with the  
407 'canalization' (per Waddington model) of the pro-metastatic clones.

408 Interestingly, our study for the first time suggests that melanomas harbor  
409 exceptionally wide H3K4me3 domains on key drivers of invasion and metastasis

410 (*POU3F2*<sup>48,43</sup>, *SOX9*<sup>49</sup>, *PDGFRA*<sup>50</sup> and *PDGFA*) and this transition was associated with  
411 increased transcriptional activation. It is likely, barring physical and chemical barrier, that  
412 addition of H3K4me3 marks on adjacent nucleosome may require less energy due to  
413 already recruited methylation machinery, and hence may be a preferred mode for relative  
414 increase in gene expression to meet the needs of metastatic cells. The observations of  
415 broad domains on critical components of the melanocyte regulatory network, including  
416 *MITF*<sup>51,52</sup>, *ZEB2*<sup>28,44</sup>, *TFAP2A*<sup>43</sup> and *PMEL* (aka *GP100*), as well as other genes not  
417 known to be previously associated with melanoma, including *MYCN*, *KLF6*, *NR2F2* and  
418 *CPEB2*, may allow for identification of pro-metastatic drivers whose expression is  
419 mediated by epigenetic events. Overall, our work identifies new principles of epigenome  
420 regulation in melanoma metastasis and strengthens the hypothesis that metastatic  
421 dissemination is likely driven by specific epigenetic events.

422

423

424

425

426

427

428

429

430

431 **Author contributions**

432 CT and KR conceptualized and designed the study; CT and MM generated the ChIP-seq  
433 data; CT, MT, AR, JS and SA processed and performed data analysis for ChIP-seq; CT,  
434 MT and AR processed and performed data analysis for RNA-seq; JO, CC, CJW, CB and  
435 SW generated and characterized the Short Term Culture datasets; EO, SS, KT, DZ and  
436 KC provided intellectual input; CT and KR wrote and prepared the manuscript. All authors  
437 read and approved the manuscript.

438

439 **Acknowledgements**

440 We are grateful to Kadir C. Akdemir, Yonathan Lissanu Deribe, Anand Singh, Scott  
441 Callahan, Veena Kochat, Sharon Landers, Angela Bhalla and Keila Torres for helpful  
442 discussions and proof reading the manuscript. The work described in this article was  
443 supported by grants from the National Institutes of Health (CA160578 to K. R.; CA157919  
444 and CA016672 to SMF Core), Center for Cancer Epigenetics at MDACC (K.R.) and MD  
445 Anderson Cancer Center (Start-up funds to K.R.). STR DNA fingerprinting was done by  
446 the UTMDACC CCSG-funded Characterized Cell Line Core, NCI # CA016672. The  
447 molecular characterization of the short-term culture tumor lines was supported by  
448 generous philanthropic contributions to The University of Texas MD Anderson Moon  
449 Shots Program.

450

451

452

453

## 454 **Methods**

### 455 **Collection of melanoma tumor samples**

456 Melanoma tumors were obtained from the Melcore tumor bank at MD Anderson Cancer  
457 Center.

### 458 **Characterization of melanoma short term cultures**

459 Melanoma short term cultures were generated from metastatic tumor specimens as part  
460 of the Adoptive T-cell Therapy Clinical Program at the University of Texas, MD Anderson  
461 Cancer Center (LAB06-0755 and 2004-0069), as previously described<sup>53, 54, 55</sup>). Briefly a  
462 tumor specimen from metastatic tumor was collected and incubated with an enzymatic  
463 digestion cocktail (0.375% collagenase type I, 75 µg/ml hyaluronidase and 250 U/mL  
464 DNase I) in tumor digestion medium (RPMI, 10 mM of HEPES, 1x Penicillin-Streptomycin  
465 and 20 ug/mL of Gentamicin; Gibco/Invitrogen) in a humidified incubator at 37°C with 5%  
466 CO<sub>2</sub> and with a gentle rotation for 2-3h to obtain a single cell suspension. The tumor  
467 digest was filtered through a 70-µm filter, washed, and re-suspended in a serum free  
468 media, which was then plated in one well of a 6-well culture plate and incubated at 37 °C.  
469 After 24h, the media was replaced with fresh tumor media, comprised of RPMI with  
470 GlutaMAX, 10% FBS, Penicillin/Streptomycin, Gentamicin, β -mercaptoethanol (50 uM,  
471 Gibco/Invitrogen), HEPES (10 mM), and insulin-selenium-transferin (5 ug/ml,  
472 Gibco/Invitrogen). Cells were grown in enriched DMEM/F12 culture media  
473 (Gibco/Invitrogen) supplemented with all growth factors including 10%FBS, sodium  
474 pyruvate (1mM), insulin-selenium-transferin, MycoZap-PR (Lonza), HEPES (10mM) and  
475 β-Mercaptoethanol. Once enough cells were grown, the purity of the tumor was tested  
476 using a melanoma tumor surface marker (MCSP-1) by flow cytometry. Cultures were

477 deemed established when the cells stained positive for a melanoma tumor marker  
478 (MCSP-1) and negative for a fibroblast marker (CD90). Appropriate serum starving was  
479 performed to eliminate fibroblasts. All cell lines were tested for mycoplasma using  
480 MycoAlert detection kit (Lonza), and fingerprinted by STR fingerprinting, and validated by  
481 comparing with matched blood samples. A few passages after a pure tumor line was  
482 established, the cells were cryopreserved and kept in stocks in liquid nitrogen until use.

483

#### 484 **Chromatin immunoprecipitation assays**

485 ChIP assays were performed as described previously<sup>56</sup>. Briefly,  $\sim 2 \times 10^7$  cells were  
486 harvested via cross-linking with 1% (wt/ vol) formaldehyde for 10 min at 37 °C with  
487 shaking. After quenching with 150 mM glycine for 10 min at 37 °C with shaking, cells were  
488 washed twice with ice-cold PBS and frozen at  $-80$  °C for further processing. Cross-linked  
489 pellets were thawed and lysed on ice for 30 min in ChIP harvest buffer (12 mM Tris-Cl, 1  
490  $\times$  PBS, 6 mM EDTA, 0.5% SDS) with protease inhibitors (Sigma). Lysed cells were  
491 sonicated with a Bioruptor (Diagenode) to obtain chromatin fragments ( $\sim 200$ – $500$  bp) and  
492 centrifuged at  $15,000 \times g$  for 15 min to obtain a soluble chromatin fraction. In parallel with  
493 cellular lysis and sonication, antibodies ( $5 \mu\text{g}/3 \times 10^6$  cells) were coupled with  $30 \mu\text{l}$  of  
494 magnetic protein G beads in binding/blocking buffer (PBS + 0.1% Tween + 0.2% BSA)  
495 for 2 h at 4 °C with rotation. Soluble chromatin was diluted five times using ChIP dilution  
496 buffer (10 mM Tris-Cl, 140 mM NaCl, 0.1% DOC, 1% Triton X, 1 mM EDTA) with protease  
497 inhibitors and added to the antibody-coupled beads with rotation at 4 °C overnight. After  
498 washing, samples were treated with elution buffer (10 mM Tris-Cl, pH 8.0, 5 mM EDTA,  
499 300 mM NaCl, 0.5% SDS), RNase A, and Proteinase K, and cross-links were reversed

500 overnight at 37. Immune complexes were then washed five times with cold RIPA buffer  
501 (10mM Tris-HCl, pH 8.0, 1mM EDTA, pH 8.0, 140mM NaCl, 1% Triton X-100, 0.1% SDS,  
502 0.1% DOC), twice with cold high-salt RIPA buffer (10mM Tris-HCl, pH 8.0, 1mM EDTA,  
503 pH 8.0, 500mM NaCl, 1% Triton X-100, 0.1% SDS, 0.1% DOC), and twice with cold LiCl  
504 buffer (10mM Tris-HCl, pH 8.0, 1mM EDTA, pH 8.0, 250mM LiCl, 0.5% NP-40, 0.5%  
505 DOC). ChIP DNA was purified using AMPure XP beads (Agencourt) and quantified using  
506 the Qubit 2000 (Invitrogen) and Bioanalyzer 1000 (Agilent). Libraries for Illumina  
507 sequencing were generated following the New England BioLabs (NEB) Next Ultra DNA  
508 Library Prep Kit protocol. A total of 10 cycles were used during PCR amplification for the  
509 generation of all ChIP-seq libraries. Amplified ChIP DNA was purified using double-sided  
510 AMPure XP to retain fragments (~200–500 bp) and quantified using the Qubit 2000 and  
511 Bioanalyzer 1000 before multiplexing.

512

### 513 **ChIP-seq data processing**

514 Raw fastq reads for all ChIP-seq experiments were processed using a snakemake based  
515 pipeline<sup>57</sup>. Briefly, raw reads were first processed using FastQC  
516 (<http://www.bioinformatics.babraham.ac.uk/projects/fastqc/>) and uniquely mapped reads  
517 were aligned to the hg19 reference genome using Bowtie version 1.1.2<sup>58</sup>. Duplicate reads  
518 were removed using SAMBLASTER<sup>59</sup> before compression to bam files. To directly  
519 compare ChIP-seq samples uniquely mapped reads for each mark were downsampled  
520 per condition to 18 million, sorted and indexed using samtools version 1.5<sup>60</sup>. To visualize  
521 ChIP-seq libraries on the IGV genome browser, we used deepTools version 2.4.0<sup>61</sup> to  
522 generate bigWig files by scaling the bam files to reads per kilobase per million (RPKM).



523 Super ChIP-seq tracks were generated by merging bam files from each cancer type,  
524 sorting and indexing using samtools and scaling to RPKM using deepTools.

525

### 526 **Chromatin state calls**

527 ChromHMM<sup>62</sup> was used to identify combinatorial chromatin state patterns based on the  
528 histone modifications studied. Normalized bam files were converted to bed files and  
529 binarized at a 1000bp resolution using the BinarizeBed command. We specified that  
530 ChromHMM should learn a model based on 18 chromatin states. As we considered  
531 models between 8 and 30 chromatin states, we chose an 18-state model because it is  
532 large enough to identify important functional elements while still being small enough to  
533 interpret easily. To determine chromatin state differences between different groups we  
534 used a two-step process. First, using the segmentation calls from the ChromHMM output  
535 the entire genome is divided into non-overlapping windows of 10 Kb. We next count the  
536 number of times a chromatin state is observed in each of the 10 Kb windows and obtain  
537 a frequency matrix for each state in the ChromHMM model (E1-E18). In the second step,  
538 low variable genomic loci are removed from the frequency matrix and significant  
539 differences between two groups of samples types are calculated by using a  
540 nonparametric Mann Whitney Wilcoxon test with a P-value < 0.05 for each state  
541 separately.

542

### 543 **Correlation of copy number from ChIPseq and SNP array.**

544 SKCM TCGA copynumber data were downloaded by TCGAbiolinks<sup>63</sup>. Copy number  
545 analysis for ChIPseq was carried out using copywriteR<sup>64</sup>, which uses off-target reads for

546 accurate copy number detection. The ChIP-seq input files were used, which represent  
547 low-pass whole genome sequencing data sets. Bin size of 200kb was used for analysis.  
548 The copy number of each gene was determined by overlapping the genes with the  
549 segmentation files from ChIPseq and SNP array, respectively. The Pearson correlation  
550 of the copy number of all genes among samples was calculated and plotted in heatmap  
551 by ComplexHeatmap.

552

### 553 **Correlation of RNA expression and chromatin state data**

554 SKCM TCGA RNAseq data were downloaded by TCGAbiolinks<sup>63</sup>. TPM (transcript per  
555 million) value was calculated from raw counts by scaling to the gene length first and then  
556 the library size. For each gene in a sample, the transcription start site is overlapped with  
557 the chromatin state segmentation file to determine the state of that gene. The expression  
558 values (TPM) for all genes and all samples are then combined and split by categories  
559 (18) of chromatin states. A box plot is plotted for each chromatin state.

560

### 561 **Correlation of DNA methylation and chromatin state data**

562 SKCM TCGA 450k DNA methylation data were downloaded by TCGAbiolinks<sup>63</sup>. For each  
563 sample and each chromatin state segmentation bin, the average of beta values from the  
564 DNA methylation data were calculated for each bin. The average values of all bins from  
565 all samples are combined and then split by categories (18) of chromatin states. A box plot  
566 is plotted for each chromatin state.

567

### 568 **Identification and visualization of ChIP-seq binding sites**

569 We used Model-based analysis of ChIP-seq (MACS) version 1.4.2<sup>65</sup> peak calling  
570 algorithm to identify H3K4me3 (p-value of 1e-5) and MACS version 2.1.0 to identify  
571 H3K27me3 (p-value of 1e-5) enrichment over “input” background. Bivalent sites were  
572 identified by overlapping H3K4me3 with H3K27me3 or H3K9me3 by a minimum of 1bp  
573 using intersectBed<sup>66</sup>. Bivalent polycomb-heterochromatin regions were identified by  
574 overlapping the H3K4me3+H3K27me3 output with H3K9me3 by a minimum of 1bp.  
575 Common sites (NRAS = 2/4, BRAF = 7/13, WT = 2/3, MSTC = 5/10, CCLE = 8/16 and  
576 Melanocytes = 2/2) were identified using bedops<sup>67</sup> with the following command; cat \*bed  
577 | sort-bed - | bedmap --count --echo --delim '\t' - | uniq | awk '\$1 >=x' | cut -f2- >  
578 samplename\_common.bed. Final peaksets used for downstream analysis were  
579 generated using mergeBed. Unique BRAF, NRAS, WT and melanocyte peaks for bivalent  
580 polycomb, bivalent heterochromatin and bivalent polycomb-heterochromatin were  
581 identified using the concatenate, cluster and subtract tools from the Galaxy/Cistrome web  
582 based platform<sup>68</sup>. To identify sites that were bivalent in melanocytes but active in  
583 melanoma tumors, and visa-versa, common H3K27me3 sites were subtracted from the  
584 opposing bivalent site in each comparison.

585

### 586 **Identification of broad H3K4me3 and H3K27me3 domains**

587 Broad H3K4me3 domains were identified using MACS2.1.0 with the broad setting (p-  
588 value of 1e-5) followed by merging adjacent peaks within 1kb using mergeBed<sup>66,69</sup>. We  
589 determined the optimal distance to merge adjacent peaks based on the number of broad  
590 H3K4me3 and H3K27me3 domains at distance thresholds between 1kb through 10kb in  
591 each mutational subtype. Broad H3K4me3 domains were further classified within the top

592 1% of the broadest peaks that extended at least 4x ( $\geq 4$ kb) beyond that of a typical  
593 H3K4me3 domain (0.2kb-1kb). Final peaksets for common sites broad and non-broad  
594 H3K4me3 and H3K27me3 domains were defined as peaks present in ~50% of each  
595 mutational subtype and melanocytes (NRAS = 2/4, BRAF = 7/13, WT = 2/3 and  
596 Melanocytes = 2/2) as described in identification and visualization of ChIP-seq binding  
597 sites.

598

### 599 **Assigning binding sites to genes**

600 A list of Ensembl genes was obtained from the UCSC Table browser  
601 (<http://genome.ucsc.edu/>). Proximal promoters were defined as  $\pm 10$ kb from the  
602 transcription start site (TSS) and genic regions were identified as +10kbTSS to the  
603 transcription end site (TES). Peaks were assigned to genes if they overlapped the  
604 promoter or genic region by a minimum of 1bp using intersectBed. Gene body heatmaps  
605 and average density plots were generated using ngs.plot<sup>70</sup>.

606

### 607 **Gene set enrichment analysis**

608 Gene Set Enrichment Analysis (GSEA) was performed using GSEA/MSigDB<sup>69</sup>  
609 HALLMARK and KEGG pathways based on ensemble gene lists from peaks within -10kb-  
610 TES for bivalent domains and  $\pm 10$ kbTSS for broad H3K4me3 domains. All pathways are  
611 significant based on FDR q-value.

612

### 613 **RNA-sequencing data processing**

614 For TCGA data, raw counts were obtained from TCGAbiolinks<sup>63</sup> in R  
615 (<http://www.rstudio.com/>).and transformed to TPM. For Roadmap data, raw counts were  
616 obtained from <http://www.roadmapepigenomics.org/> and transformed to TPM. For all  
617 RNA-seq boxplots, gene expression values from both datasets were normalized using  
618 quantile normalization function in R. For identification of differentially expressed genes  
619 and GSEA analysis between NRAS and BRAF melanoma tumors, raw counts were  
620 obtained from TCGAbiolinks. DESeq2<sup>71</sup> was employed for normalization of differential  
621 gene expression analysis. GSEA<sup>69</sup> was run on a ranked gene list using HALLMARK gene  
622 sets with default settings.

### 623 **Data and software availability**

624 The CHIP and mRNA sequencing data have been deposited in the NCBI GEO BioProject  
625 database with the following accession number GSE134043.

626  
627 .

628

629

630

631

632

633

634

635

636

637

638

## 639 References

- 640 1 Miller, A. J. & Mihm, M. C., Jr. Melanoma. *N Engl J Med* **355**, 51-65,  
641 doi:10.1056/NEJMra052166 (2006).
- 642 2 Lideikaite, A., Mozuraitiene, J. & Letautiene, S. Analysis of prognostic factors for  
643 melanoma patients. *Acta Med Litu* **24**, 25-34, doi:10.6001/actamedica.v24i1.3460 (2017).
- 644 3 Cui, C. *et al.* Multifactorial Analysis of Prognostic Factors and Survival Rates Among 706  
645 Mucosal Melanoma Patients. *Ann Surg Oncol* **25**, 2184-2192, doi:10.1245/s10434-018-  
646 6503-9 (2018).
- 647 4 Rosenberg, S. A. *et al.* Durable complete responses in heavily pretreated patients with  
648 metastatic melanoma using T-cell transfer immunotherapy. *Clin Cancer Res* **17**, 4550-  
649 4557, doi:10.1158/1078-0432.CCR-11-0116 (2011).
- 650 5 Tawbi, H. A. *et al.* Combined Nivolumab and Ipilimumab in Melanoma Metastatic to the  
651 Brain. *N Engl J Med* **379**, 722-730, doi:10.1056/NEJMoa1805453 (2018).
- 652 6 Cancer Genome Atlas, N. Genomic Classification of Cutaneous Melanoma. *Cell* **161**,  
653 1681-1696, doi:10.1016/j.cell.2015.05.044 (2015).
- 654 7 Hodis, E. *et al.* A landscape of driver mutations in melanoma. *Cell* **150**, 251-263,  
655 doi:10.1016/j.cell.2012.06.024 (2012).
- 656 8 Tsao, H., Chin, L., Garraway, L. A. & Fisher, D. E. Melanoma: from mutations to  
657 medicine. *Genes Dev* **26**, 1131-1155, doi:10.1101/gad.191999.112 (2012).
- 658 9 Wu, J. N. & Roberts, C. W. ARID1A mutations in cancer: another epigenetic tumor  
659 suppressor? *Cancer Discov* **3**, 35-43, doi:10.1158/2159-8290.CD-12-0361 (2013).
- 660 10 Simon, J. A. & Lange, C. A. Roles of the EZH2 histone methyltransferase in cancer  
661 epigenetics. *Mutat Res* **647**, 21-29, doi:10.1016/j.mrfmmm.2008.07.010 (2008).
- 662 11 Ceccarelli, M. *et al.* Molecular Profiling Reveals Biologically Discrete Subsets and  
663 Pathways of Progression in Diffuse Glioma. *Cell* **164**, 550-563,  
664 doi:10.1016/j.cell.2015.12.028 (2016).
- 665 12 Vallianatos, C. N. & Iwase, S. Disrupted intricacy of histone H3K4 methylation in  
666 neurodevelopmental disorders. *Epigenomics* **7**, 503-519, doi:10.2217/epi.15.1 (2015).
- 667 13 Ortega-Molina, A. *et al.* The histone lysine methyltransferase KMT2D sustains a gene  
668 expression program that represses B cell lymphoma development. *Nat Med* **21**, 1199-1208,  
669 doi:10.1038/nm.3943 (2015).
- 670 14 Lin, C. Y. *et al.* Active medulloblastoma enhancers reveal subgroup-specific cellular  
671 origins. *Nature* **530**, 57-62, doi:10.1038/nature16546 (2016).
- 672 15 Roe, J. S. *et al.* Enhancer Reprogramming Promotes Pancreatic Cancer Metastasis. *Cell*  
673 **170**, 875-888 e820, doi:10.1016/j.cell.2017.07.007 (2017).
- 674 16 Lomberk, G. *et al.* Distinct epigenetic landscapes underlie the pathobiology of pancreatic  
675 cancer subtypes. *Nat Commun* **9**, 1978, doi:10.1038/s41467-018-04383-6 (2018).
- 676 17 Kapoor, A. *et al.* The histone variant macroH2A suppresses melanoma progression through  
677 regulation of CDK8. *Nature* **468**, 1105-1109, doi:10.1038/nature09590 (2010).
- 678 18 Vardabasso, C., Hake, S. B. & Bernstein, E. Histone variant H2A.Z.2: A novel driver of  
679 melanoma progression. *Mol Cell Oncol* **3**, e1073417,  
680 doi:10.1080/23723556.2015.1073417 (2016).

- 681 19 Fiziev, P. *et al.* Systematic Epigenomic Analysis Reveals Chromatin States Associated  
682 with Melanoma Progression. *Cell Rep* **19**, 875-889, doi:10.1016/j.celrep.2017.03.078  
683 (2017).
- 684 20 Corces, M. R. *et al.* The chromatin accessibility landscape of primary human cancers.  
685 *Science* **362**, doi:10.1126/science.aav1898 (2018).
- 686 21 Roadmap Epigenomics, C. *et al.* Integrative analysis of 111 reference human epigenomes.  
687 *Nature* **518**, 317-330, doi:10.1038/nature14248 (2015).
- 688 22 Consortium, E. P. An integrated encyclopedia of DNA elements in the human genome.  
689 *Nature* **489**, 57-74, doi:10.1038/nature11247 (2012).
- 690 23 Barretina, J. *et al.* The Cancer Cell Line Encyclopedia enables predictive modelling of  
691 anticancer drug sensitivity. *Nature* **483**, 603-607, doi:10.1038/nature11003 (2012).
- 692 24 Bernstein, B. E. *et al.* A bivalent chromatin structure marks key developmental genes in  
693 embryonic stem cells. *Cell* **125**, 315-326, doi:10.1016/j.cell.2006.02.041 (2006).
- 694 25 Voigt, P., Tee, W. W. & Reinberg, D. A double take on bivalent promoters. *Genes Dev* **27**,  
695 1318-1338, doi:10.1101/gad.219626.113 (2013).
- 696 26 Jadhav, U. *et al.* Acquired Tissue-Specific Promoter Bivalency Is a Basis for PRC2  
697 Necessity in Adult Cells. *Cell* **165**, 1389-1400, doi:10.1016/j.cell.2016.04.031 (2016).
- 698 27 Brabletz, T., Kalluri, R., Nieto, M. A. & Weinberg, R. A. EMT in cancer. *Nat Rev Cancer*  
699 **18**, 128-134, doi:10.1038/nrc.2017.118 (2018).
- 700 28 Caramel, J. *et al.* A switch in the expression of embryonic EMT-inducers drives the  
701 development of malignant melanoma. *Cancer Cell* **24**, 466-480,  
702 doi:10.1016/j.ccr.2013.08.018 (2013).
- 703 29 Kalluri, R. & Weinberg, R. A. The basics of epithelial-mesenchymal transition. *J Clin*  
704 *Invest* **119**, 1420-1428, doi:10.1172/JCI39104 (2009).
- 705 30 Chaffer, C. L. *et al.* Poised chromatin at the ZEB1 promoter enables breast cancer cell  
706 plasticity and enhances tumorigenicity. *Cell* **154**, 61-74, doi:10.1016/j.cell.2013.06.005  
707 (2013).
- 708 31 Marjanovic, N. D., Weinberg, R. A. & Chaffer, C. L. Poised with purpose: cell plasticity  
709 enhances tumorigenicity. *Cell Cycle* **12**, 2713-2714, doi:10.4161/cc.26075 (2013).
- 710 32 Ferretti, R., Bhutkar, A., McNamara, M. C. & Lees, J. A. BMI1 induces an invasive  
711 signature in melanoma that promotes metastasis and chemoresistance. *Genes Dev* **30**, 18-  
712 33, doi:10.1101/gad.267757.115 (2016).
- 713 33 Rai, K. *et al.* Dual Roles of RNF2 in Melanoma Progression. *Cancer Discov* **5**, 1314-1327,  
714 doi:10.1158/2159-8290.CD-15-0493 (2015).
- 715 34 Benayoun, B. A. *et al.* H3K4me3 breadth is linked to cell identity and transcriptional  
716 consistency. *Cell* **158**, 673-688, doi:10.1016/j.cell.2014.06.027 (2014).
- 717 35 Dahl, J. A. *et al.* Broad histone H3K4me3 domains in mouse oocytes modulate maternal-  
718 to-zygotic transition. *Nature* **537**, 548-552, doi:10.1038/nature19360 (2016).
- 719 36 Chen, K. *et al.* Broad H3K4me3 is associated with increased transcription elongation and  
720 enhancer activity at tumor-suppressor genes. *Nat Genet* **47**, 1149-1157,  
721 doi:10.1038/ng.3385 (2015).
- 722 37 Ueda, Y. & Richmond, A. NF-kappaB activation in melanoma. *Pigment Cell Res* **19**, 112-  
723 124, doi:10.1111/j.1600-0749.2006.00304.x (2006).
- 724 38 Damsky, W. E. *et al.* beta-catenin signaling controls metastasis in Braf-activated Pten-  
725 deficient melanomas. *Cancer Cell* **20**, 741-754, doi:10.1016/j.ccr.2011.10.030 (2011).

- 726 39 Sinnberg, T. *et al.* Wnt-signaling enhances neural crest migration of melanoma cells and  
727 induces an invasive phenotype. *Mol Cancer* **17**, 59, doi:10.1186/s12943-018-0773-5  
728 (2018).
- 729 40 Alexaki, V. I. *et al.* GLI2-mediated melanoma invasion and metastasis. *J Natl Cancer Inst*  
730 **102**, 1148-1159, doi:10.1093/jnci/djq257 (2010).
- 731 41 Geng, L. *et al.* Hedgehog signaling in the murine melanoma microenvironment.  
732 *Angiogenesis* **10**, 259-267, doi:10.1007/s10456-007-9078-9 (2007).
- 733 42 Stecca, B. *et al.* Melanomas require HEDGEHOG-GLI signaling regulated by interactions  
734 between GLI1 and the RAS-MEK/AKT pathways. *Proc Natl Acad Sci U S A* **104**, 5895-  
735 5900, doi:10.1073/pnas.0700776104 (2007).
- 736 43 Seberg, H. E. *et al.* TFAP2 paralogs regulate melanocyte differentiation in parallel with  
737 MITF. *PLoS Genet* **13**, e1006636, doi:10.1371/journal.pgen.1006636 (2017).
- 738 44 Denecker, G. *et al.* Identification of a ZEB2-MITF-ZEB1 transcriptional network that  
739 controls melanogenesis and melanoma progression. *Cell Death Differ* **21**, 1250-1261,  
740 doi:10.1038/cdd.2014.44 (2014).
- 741 45 McDonald, O. G. *et al.* Epigenomic reprogramming during pancreatic cancer progression  
742 links anabolic glucose metabolism to distant metastasis. *Nat Genet* **49**, 367-376,  
743 doi:10.1038/ng.3753 (2017).
- 744 46 Fidler, I. J. The pathogenesis of cancer metastasis: the 'seed and soil' hypothesis revisited.  
745 *Nat Rev Cancer* **3**, 453-458, doi:10.1038/nrc1098 (2003).
- 746 47 Noble, D. Conrad Waddington and the origin of epigenetics. *J Exp Biol* **218**, 816-818,  
747 doi:10.1242/jeb.120071 (2015).
- 748 48 Simmons, J. L., Pierce, C. J., Al-Ejeh, F. & Boyle, G. M. MITF and BRN2 contribute to  
749 metastatic growth after dissemination of melanoma. *Sci Rep* **7**, 10909, doi:10.1038/s41598-  
750 017-11366-y (2017).
- 751 49 Cheng, P. F. *et al.* Methylation-dependent SOX9 expression mediates invasion in human  
752 melanoma cells and is a negative prognostic factor in advanced melanoma. *Genome Biol*  
753 **16**, 42, doi:10.1186/s13059-015-0594-4 (2015).
- 754 50 Eckert, M. A. *et al.* Twist1-induced invadopodia formation promotes tumor metastasis.  
755 *Cancer Cell* **19**, 372-386, doi:10.1016/j.ccr.2011.01.036 (2011).
- 756 51 Li, F. Z., Dhillon, A. S., Anderson, R. L., McArthur, G. & Ferrao, P. T. Phenotype  
757 switching in melanoma: implications for progression and therapy. *Front Oncol* **5**, 31,  
758 doi:10.3389/fonc.2015.00031 (2015).
- 759 52 Kemper, K., de Goeje, P. L., Peeper, D. S. & van Amerongen, R. Phenotype switching:  
760 tumor cell plasticity as a resistance mechanism and target for therapy. *Cancer Res* **74**,  
761 5937-5941, doi:10.1158/0008-5472.CAN-14-1174 (2014).
- 762 53 Oba, J. *et al.* Targeting the HGF/MET Axis Counters Primary Resistance to KIT Inhibition  
763 in KIT-Mutant Melanoma. *JCO Precis Oncol* **2018**, doi:10.1200/PO.18.00055 (2018).
- 764 54 Besser, M. J. *et al.* Minimally cultured or selected autologous tumor-infiltrating  
765 lymphocytes after a lympho-depleting chemotherapy regimen in metastatic melanoma  
766 patients. *J Immunother* **32**, 415-423, doi:10.1097/CJI.0b013e31819c8bda (2009).
- 767 55 Park, J. *et al.* SLC45A2: A Melanoma Antigen with High Tumor Selectivity and Reduced  
768 Potential for Autoimmune Toxicity. *Cancer Immunol Res* **5**, 618-629, doi:10.1158/2326-  
769 6066.CIR-17-0051 (2017).



- 770 56 Terranova, C. *et al.* An Integrated Platform for Genome-wide Mapping of Chromatin States  
771 Using High-throughput ChIP-sequencing in Tumor Tissues. *J Vis Exp*, doi:10.3791/56972  
772 (2018).
- 773 57 Blecher-Gonen, R. *et al.* High-throughput chromatin immunoprecipitation for genome-  
774 wide mapping of in vivo protein-DNA interactions and epigenomic states. *Nat Protoc* **8**,  
775 539-554, doi:10.1038/nprot.2013.023 (2013).
- 776 58 Langmead, B., Trapnell, C., Pop, M. & Salzberg, S. L. Ultrafast and memory-efficient  
777 alignment of short DNA sequences to the human genome. *Genome Biol* **10**, R25,  
778 doi:10.1186/gb-2009-10-3-r25 (2009).
- 779 59 Faust, G. G. & Hall, I. M. SAMBLASTER: fast duplicate marking and structural variant  
780 read extraction. *Bioinformatics* **30**, 2503-2505, doi:10.1093/bioinformatics/btu314 (2014).
- 781 60 Li, J. *et al.* Identification of retinoic acid-regulated nuclear matrix-associated protein as a  
782 novel regulator of gastric cancer. *Br J Cancer* **101**, 691-698, doi:6605202 [pii]  
783 10.1038/sj.bjc.6605202 (2009).
- 784 61 Ramirez, F. *et al.* deepTools2: a next generation web server for deep-sequencing data  
785 analysis. *Nucleic Acids Res* **44**, W160-165, doi:10.1093/nar/gkw257 (2016).
- 786 62 Ernst, J. & Kellis, M. ChromHMM: automating chromatin-state discovery and  
787 characterization. *Nat Methods* **9**, 215-216, doi:10.1038/nmeth.1906 (2012).
- 788 63 Colaprico, A. *et al.* TCGAAbiolinks: an R/Bioconductor package for integrative analysis of  
789 TCGA data. *Nucleic Acids Res* **44**, e71, doi:10.1093/nar/gkv1507 (2016).
- 790 64 Kuilman, T. *et al.* CopywriteR: DNA copy number detection from off-target sequence data.  
791 *Genome Biol* **16**, 49, doi:10.1186/s13059-015-0617-1 (2015).
- 792 65 Zhang, M. *et al.* Identification of tumor-initiating cells in a p53-null mouse model of breast  
793 cancer. *Cancer Res* **68**, 4674-4682, doi:10.1158/0008-5472.CAN-07-6353 (2008).
- 794 66 Quinlan, A. R. & Hall, I. M. BEDTools: a flexible suite of utilities for comparing genomic  
795 features. *Bioinformatics* **26**, 841-842, doi:10.1093/bioinformatics/btq033 (2010).
- 796 67 Neph, S. *et al.* BEDOPS: high-performance genomic feature operations. *Bioinformatics*  
797 **28**, 1919-1920, doi:10.1093/bioinformatics/bts277 (2012).
- 798 68 Liu, T. *et al.* Cistrome: an integrative platform for transcriptional regulation studies.  
799 *Genome Biol* **12**, R83, doi:10.1186/gb-2011-12-8-r83 (2011).
- 800 69 Subramanian, A. *et al.* Gene set enrichment analysis: a knowledge-based approach for  
801 interpreting genome-wide expression profiles. *Proc Natl Acad Sci U S A* **102**, 15545-  
802 15550, doi:10.1073/pnas.0506580102 (2005).
- 803 70 Shen, L., Shao, N., Liu, X. & Nestler, E. ngs.plot: Quick mining and visualization of next-  
804 generation sequencing data by integrating genomic databases. *BMC Genomics* **15**, 284,  
805 doi:10.1186/1471-2164-15-284 (2014).
- 806 71 Love, M. I., Huber, W. & Anders, S. Moderated estimation of fold change and dispersion  
807 for RNA-seq data with DESeq2. *Genome Biol* **15**, 550, doi:10.1186/s13059-014-0550-8  
808 (2014).
- 809 72 Xie, W.J., Zhang, B. Learning mechanism of chromatin domain formation with big data.  
810 biorxiv = <https://doi.org/10.1101/456525>. (2018)

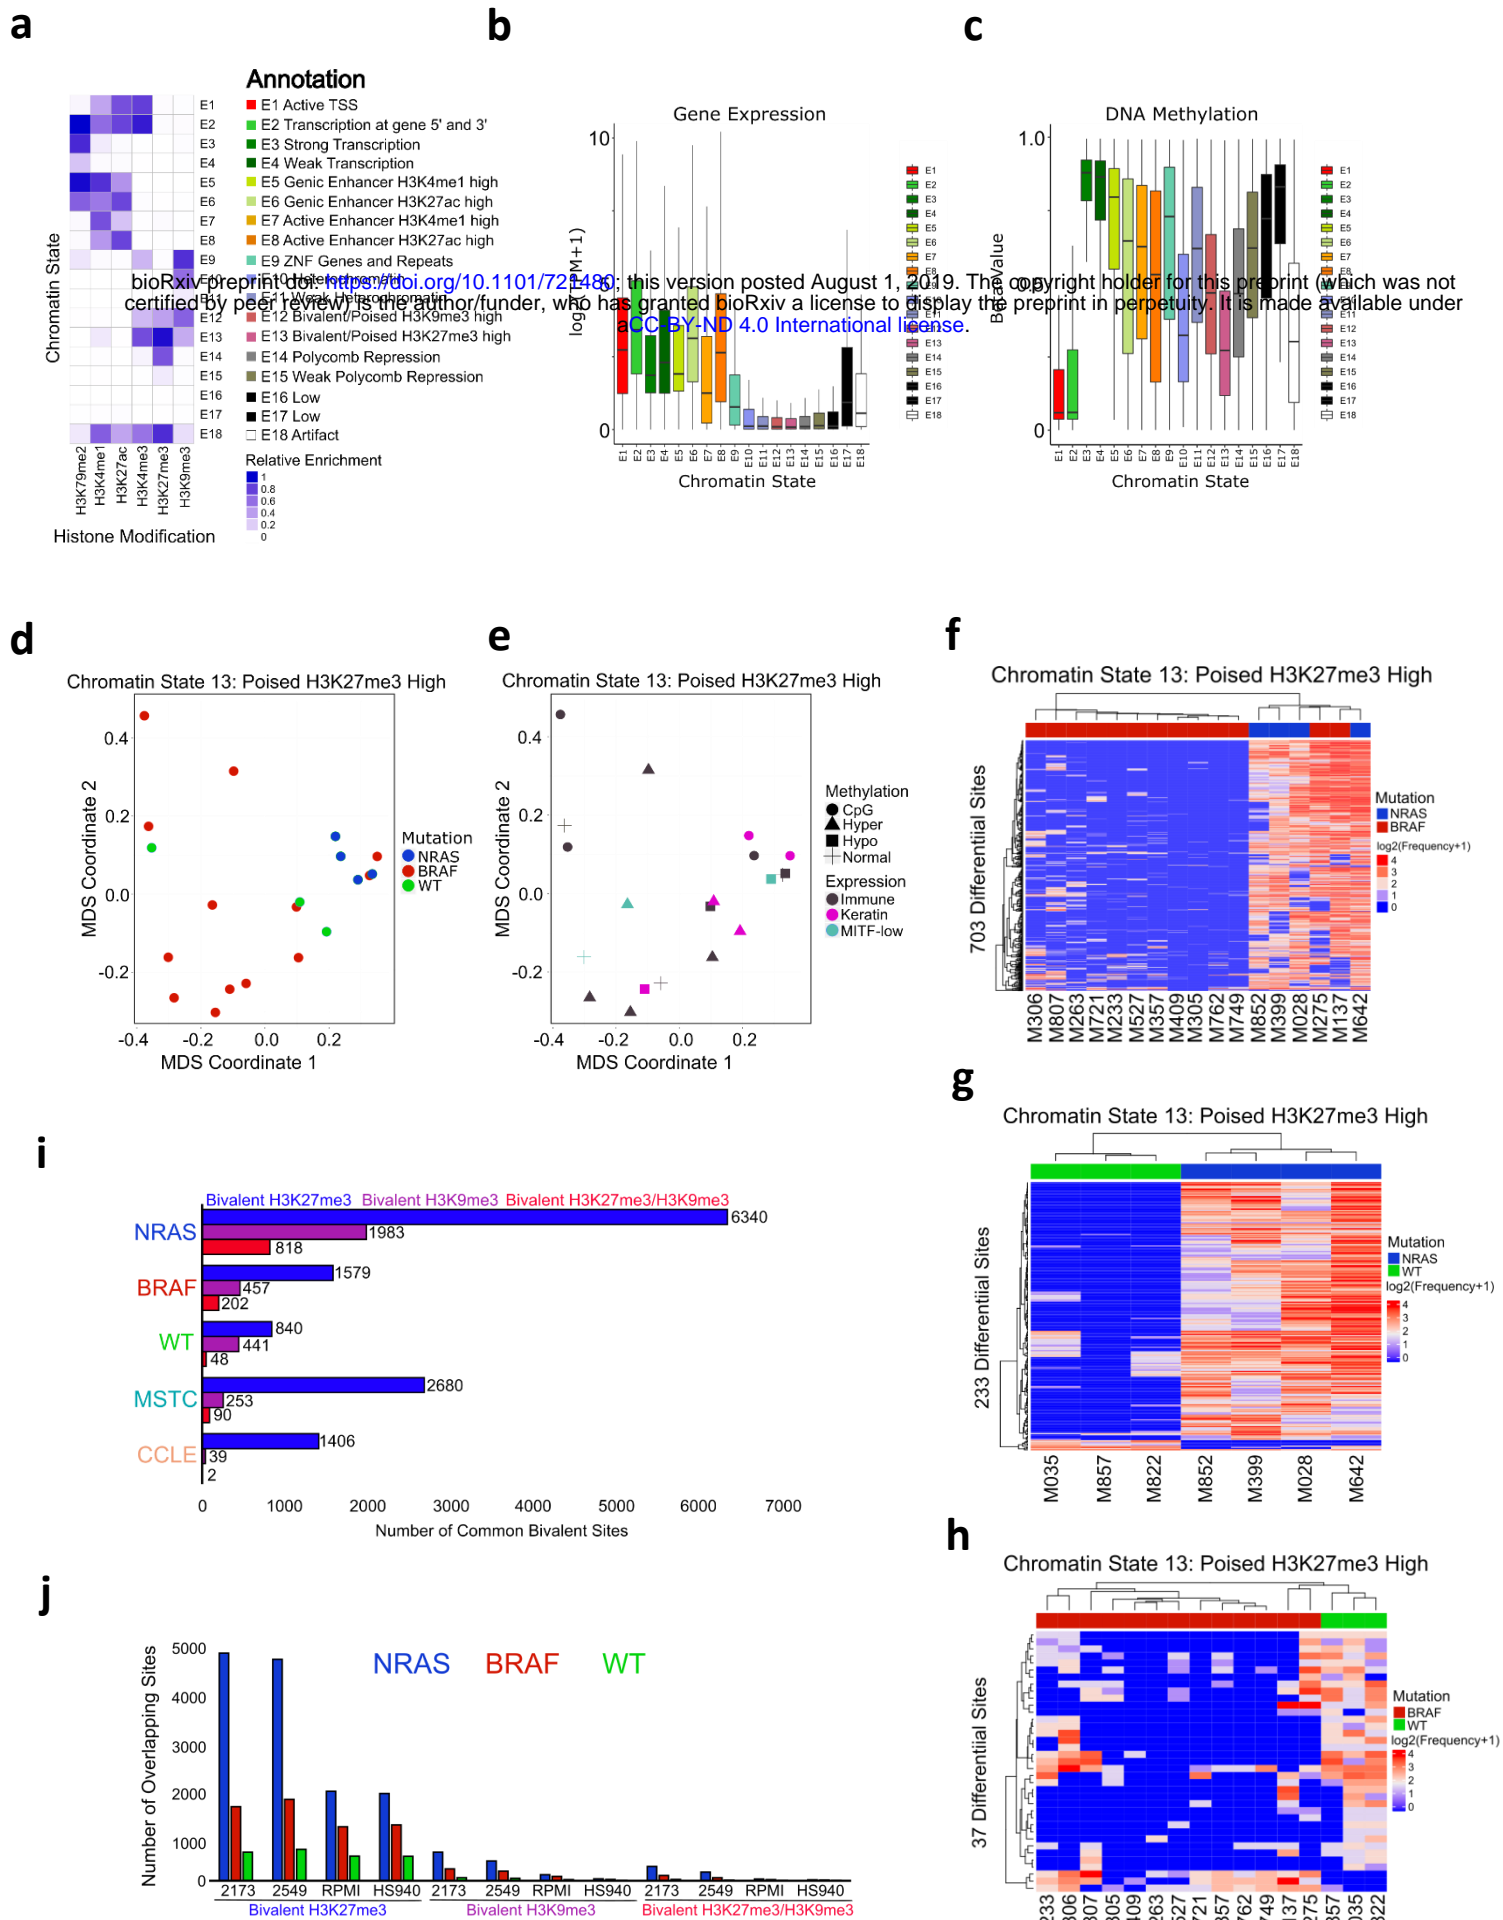

**Figure 1: Bivalent chromatin domains distinguish metastatic melanoma tumors based on mutational subtypes**

a) Combinatorial chromatin state definitions and histone mark probabilities identified in 20 metastatic melanoma tumor samples using the ChromHMM algorithm.

b) Boxplot illustrating mean expression of genes from RNA-seq based on genomic regions overlapping with each chromatin state.

c) Boxplot illustrating mean DNA methylation levels based on genomic regions overlapping with each chromatin state.

d) MDS analysis of chromatin state E13 (poised H3K27me3 high) annotated by mutation (NRAS, BRAF, WT), (e) RNA-expression (Immune, Keratin, MITF-low) and DNA methylation (Normal, CpG, Hyper, Hypo) classifications from The Cancer Genome Atlas.

f) Heatmap displaying differentially regulated regions (FDR < 0.05) of chromatin state E13 (poised H3K27me3 high) between NRAS and BRAF, (g) NRAS and WT and (h) BRAF and WT tumor subtypes.

i) Common bivalent H3K27me3 (H3K4me3+H3K27me3), bivalent H3K9me3 (H3K4me3+H3K9me3) and bivalent H3K27/H3K9me3 (H3K4me3+H3K27me3+H3K9me3) binding sites in melanoma tumor subtypes, MSTC and CCLC lines. Binding sites were identified as common if they were present in at ~50% of the samples (NRAS = 2/4, BRAF = 7/13, WT = 2/3, MSTC = 5/10 and CCLC = 8/16).

j) Co-occupancy analysis of common bivalent binding sites in melanoma tumor subtypes directly overlapping bivalent binding sites in representative MSTC or CCLC lines.

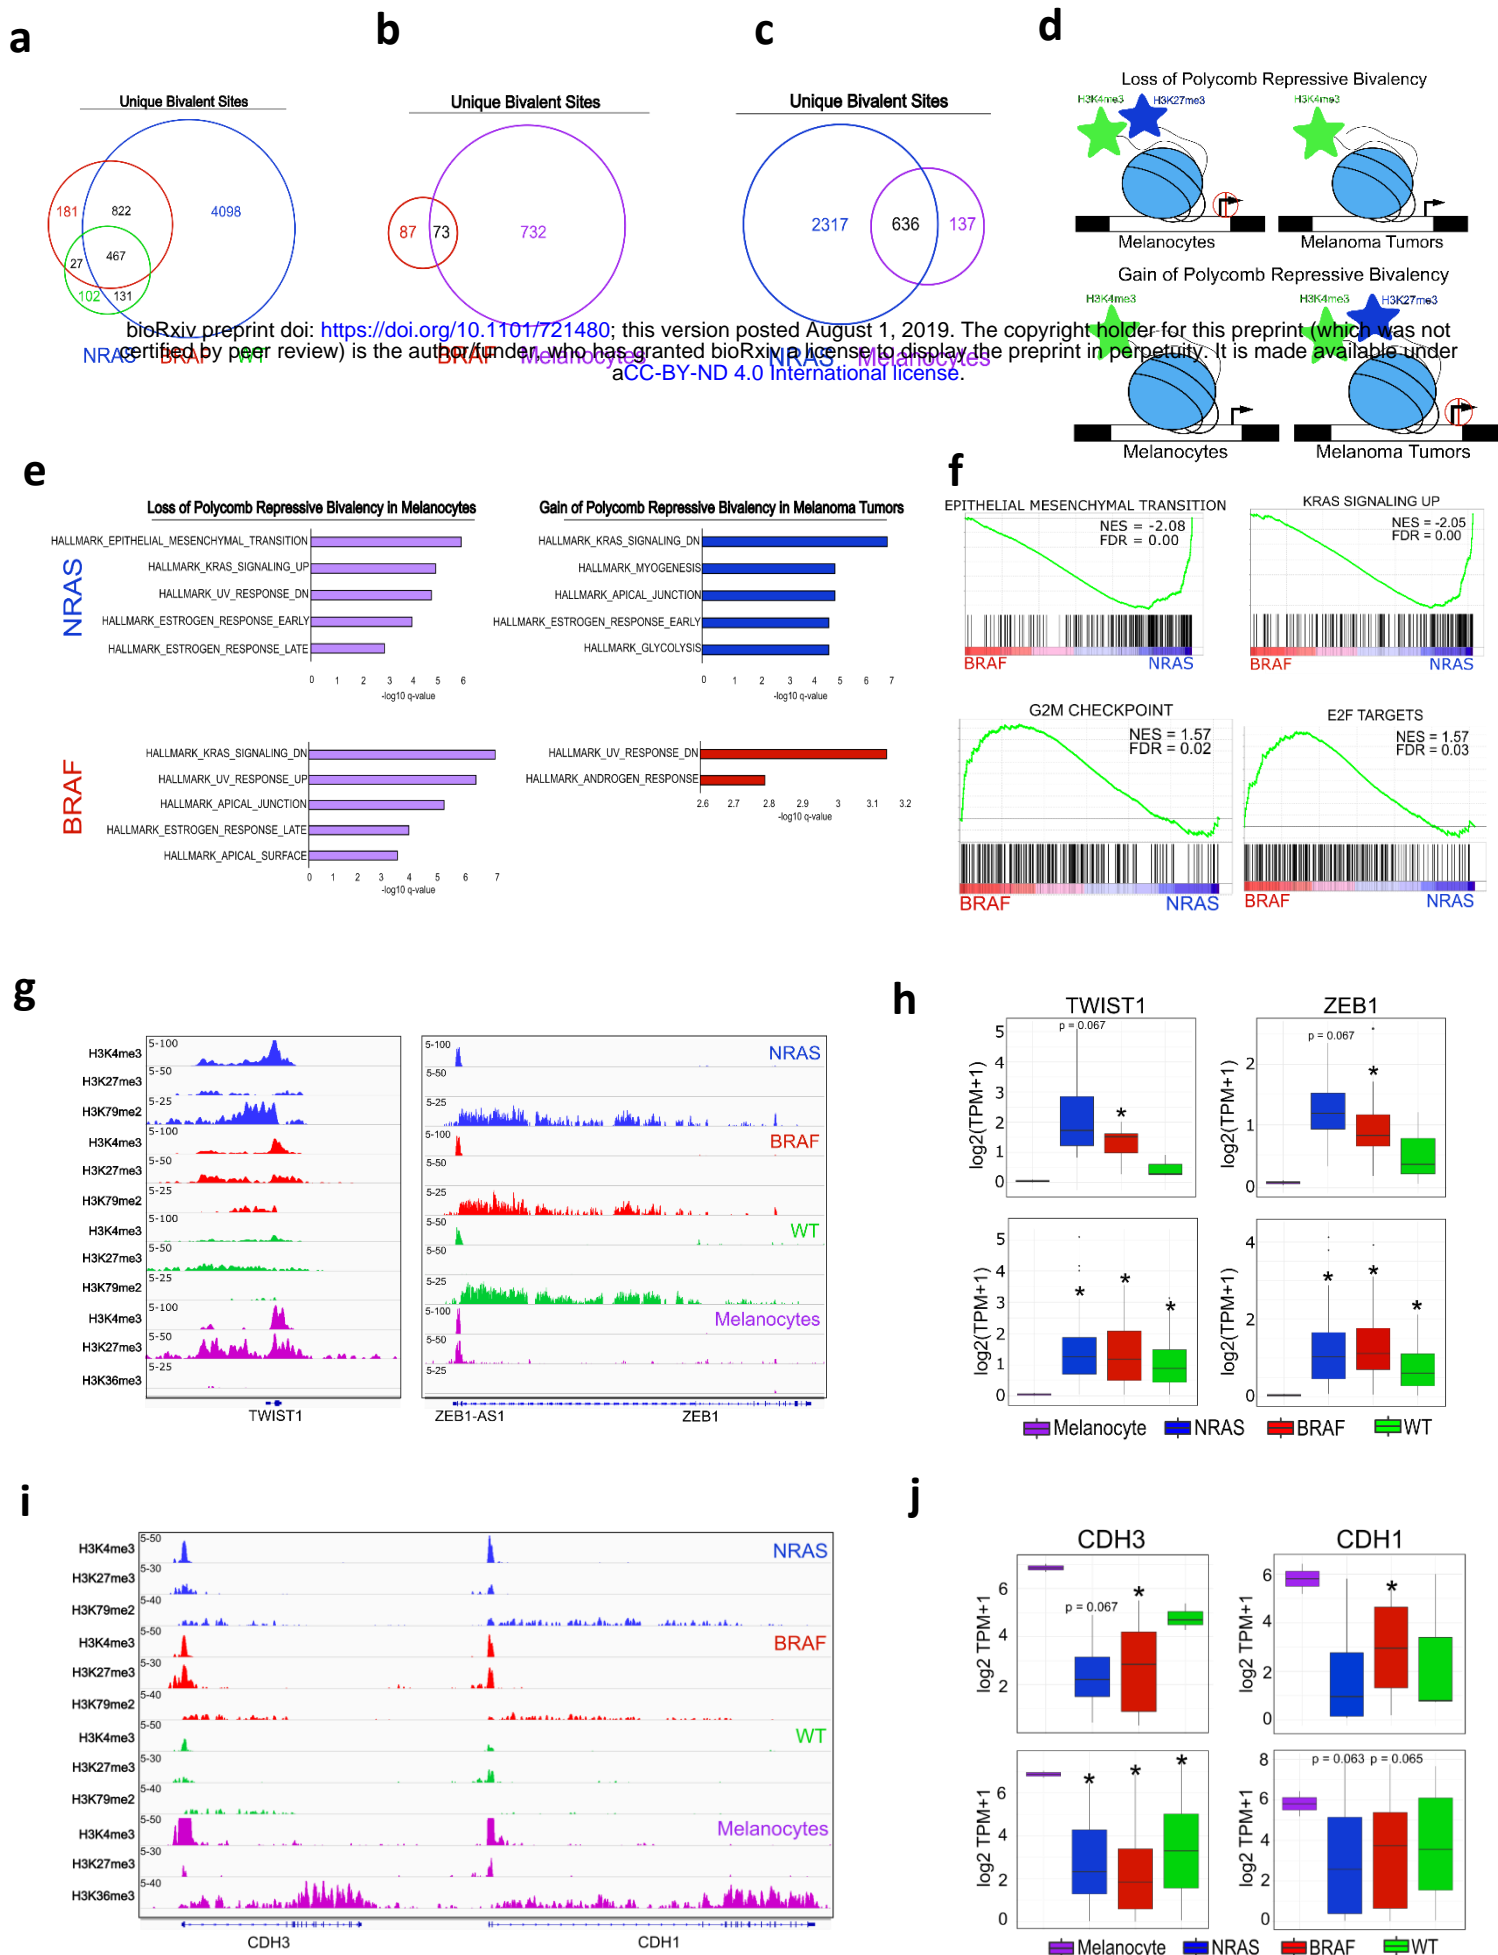

**Figure 2: Bivalent domains are lost and gained on key mesenchymal genes in metastatic melanoma.**

a) Venn diagram analysis of bivalent H3K27me3 sites in NRAS, BRAF and WT tumor subtypes.

b, c) Venn diagram analysis of unique bivalent H3K27me3 sites in NRAS and BRAF tumor subtypes overlapping bivalent polycomb sites in primary melanocytes from Roadmap.

d) Schematic of bivalent H3K27me3 losses and gains in melanocytes vs melanoma tumors.

e) Top 5 significant MSigDB/GSEA HALLMARK pathways based on bivalent H3K27me3 sites that are lost and gained within +/-10kbTSS-TES of a gene in NRAS and BRAF tumor subtypes.

f) Significant GSEA HALLMARK pathways based on differentially expressed genes between NRAS (n = 81) vs BRAF (n = 118) metastatic melanoma tumor samples from TCGA.

g) Genome browser view of ChIP-seq tracks for H3K4me3, H3K27me3 and active transcription (H3K79me2/H3K36me3) on the TWIST1 and ZEB1 genes in melanocytes and melanoma tumor subtypes.

h) Boxplot displaying quantile normalized mean RNA-expression profiles (log2 TPM) of the TWIST1 and ZEB1 genes in melanocytes (n=2) and melanoma tumor subtypes (NRAS=4, BRAF=13, WT=3 (top), NRAS=81, BRAF=118, WT=38 (bottom)). Asterisk denotes p-value < 0.05.

i) Genome browser view of ChIP-seq tracks for H3K4me3, H3K27me3 and active transcription (H3K79me2/H3K36me3) on the CDH3 and CDH1 genes in melanocytes and melanoma tumor subtypes.

j) Boxplot displaying quantile normalized mean RNA-expression profiles (log2 TPM) of the CDH3 and CDH1 genes in melanocytes (n=2) and melanoma tumor subtypes (NRAS=4, BRAF=13, WT=3 (top), NRAS=81, BRAF=118, WT=38 (bottom)). Asterisk denotes p-value < 0.05.

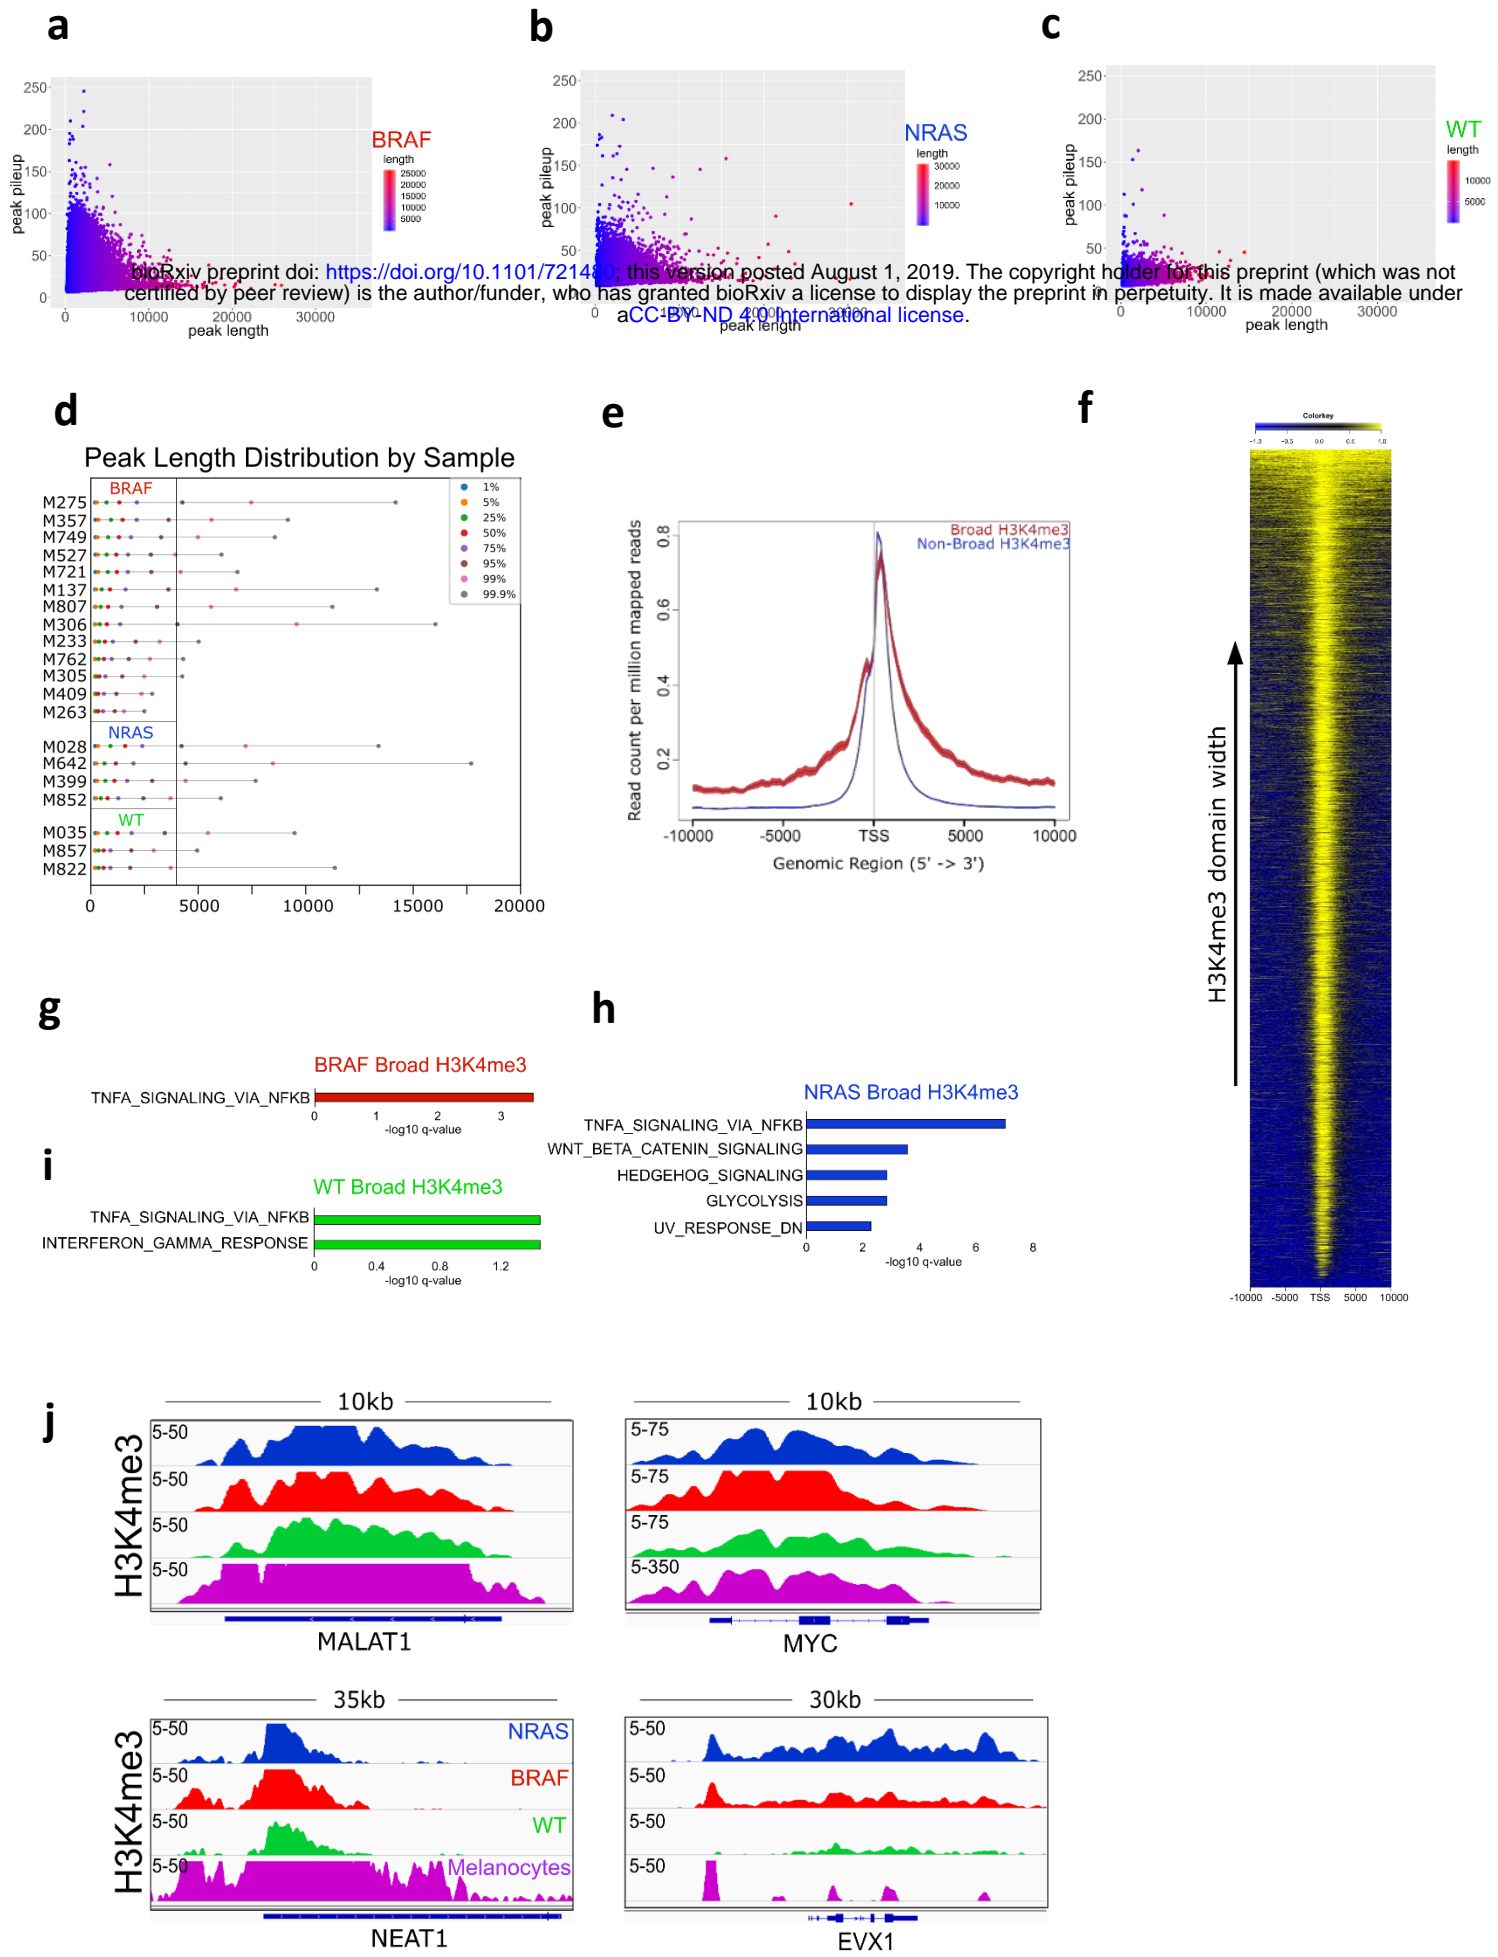

**Figure 3: Distribution of exceptionally wide broad H3K4me3 domains in metastatic melanoma**

a) Scatterplots of peak width (x-axis) and height (y-axis) from MACS2 broad peak calls (p-value  $1e-5$ ) for H3K4me3 in BRAF mutant tumors.  
 b) Scatterplots of peak width (x-axis) and height (y-axis) from MACS2 broad peak calls (p-value  $1e-5$ ) for H3K4me3 in NRAS mutant tumors.  
 c) Scatterplots of peak width (x-axis) and height (y-axis) from MACS2 broad peak calls (p-value  $1e-5$ ) for H3K4me3 in WT tumors.  
 d) Quartile plot displaying peak length distribution based on percentage of broadest H3K4me3 domains in melanoma tumors. Black line denotes 4kb peak length.  
 e) Average density profile displaying broad (>4kb) and non-broad (<4kb) H3K4me3 domains at 10kb to +10kb around TSS.  
 f) Heatmap of H3K4me3 signal sorted by width at -10kb to +10kb around transcription start sites (TSS).  
 g) Top significant MSigDB/GSEA HALLMARK pathways based on broad H3K4me3 domains within +/-10kbTSS of a gene in BRAF-mutant tumors.  
 h) Top significant MSigDB/GSEA HALLMARK pathways based on broad H3K4me3 domains within +/-10kbTSS of a gene in NRAS-mutant tumors.  
 i) Top significant MSigDB/GSEA HALLMARK pathways based on broad H3K4me3 domains within +/-10kbTSS of a gene in WT tumors.  
 j) Genome browser view of ChIP-seq tracks for H3K4me3 on the *MALAT1*, *NEAT1*, *MYC* and *EVX1* genes in melanocytes and melanoma mutational subtypes.

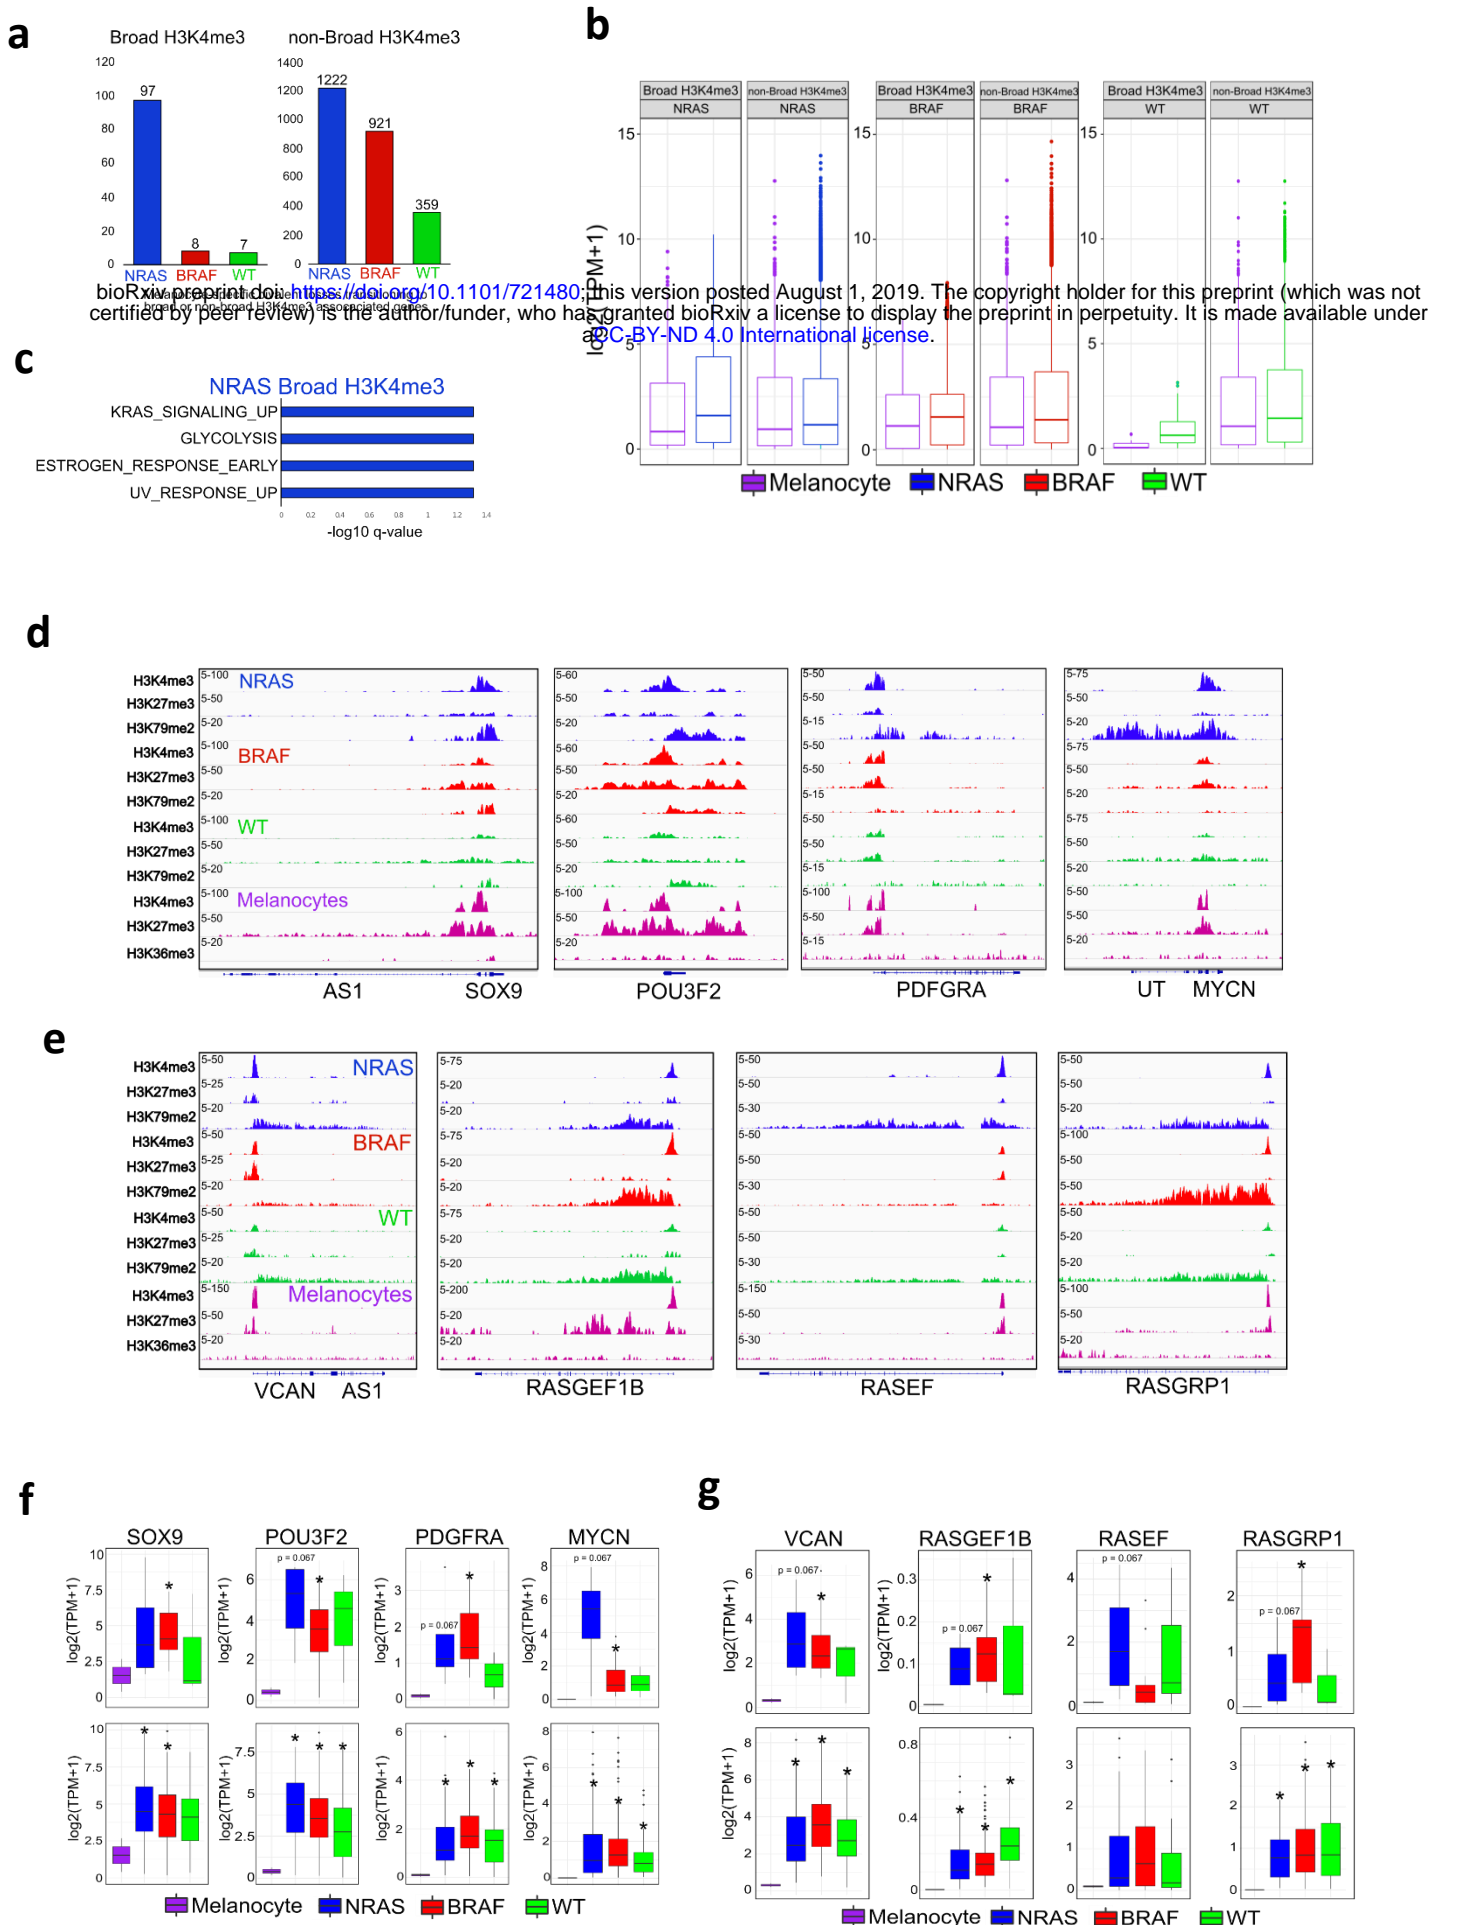

**Figure 4: Melanocyte-specific bivalent genes transition to transcriptionally active broad H3K4me3 in NRAS mutant subtypes**

a) Barplot of bivalent H3K27me3 genes (-/+10kbTSS-TES) that are lost in melanocytes and associated with broad or non-broad H3K4me3 in NRAS, BRAF and WT tumor subtypes.

b) Barplot displaying quantile normalized mean RNA-expression profiles of NRAS (n=81), BRAF (n=118) and WT (n = 38) tumor subtypes based on broad or non-broad H3K4me3 genes identified in (a).

c) Top significant GSEA HALLMARK pathways based on bivalent H3K27me3 genes (-/+10kbTSS-TES) that are lost in melanocytes and associated with broad H3K4me3 in NRAS tumor subtypes identified in (a)

d) Genome browser views of ChIP-seq tracks for H3K4me3, H3K27me3 and active transcription (H3K79me2/H3K36me3) on the *SOX9*, *POU3F2*, *PDGFRA* and *MYCN* genes in melanocytes and melanoma tumor subtypes.

e) Genome browser views of ChIP-seq tracks for H3K4me3, H3K27me3 and active transcription (H3K79me2/H3K36me3) on the *VCAN*, *RASGEF1B*, *RASEF* and *RASGRP1* genes in melanocytes and melanoma tumor subtypes.

f) Boxplot displaying quantile normalized mean RNA-expression profiles ( $\log_2$  TPM) of the *SOX9*, *POU3F2*, *PDGFRA* and *MYCN* genes in melanocytes (n=2) and melanoma tumor subtypes (NRAS=4, BRAF=13, WT=3 (top), NRAS=81, BRAF=118, WT=38 (bottom)). Asterisk denotes p-value < 0.05.

g) Boxplot displaying quantile normalized mean RNA-expression profiles ( $\log_2$  TPM) of the *VCAN*, *RASGEF1B*, *RASEF* and *RASGRP1* genes in melanocytes (n=2) and melanoma tumor subtypes (NRAS=4, BRAF=13, WT=3 (top), NRAS=81, BRAF=118, WT=38 (bottom)).

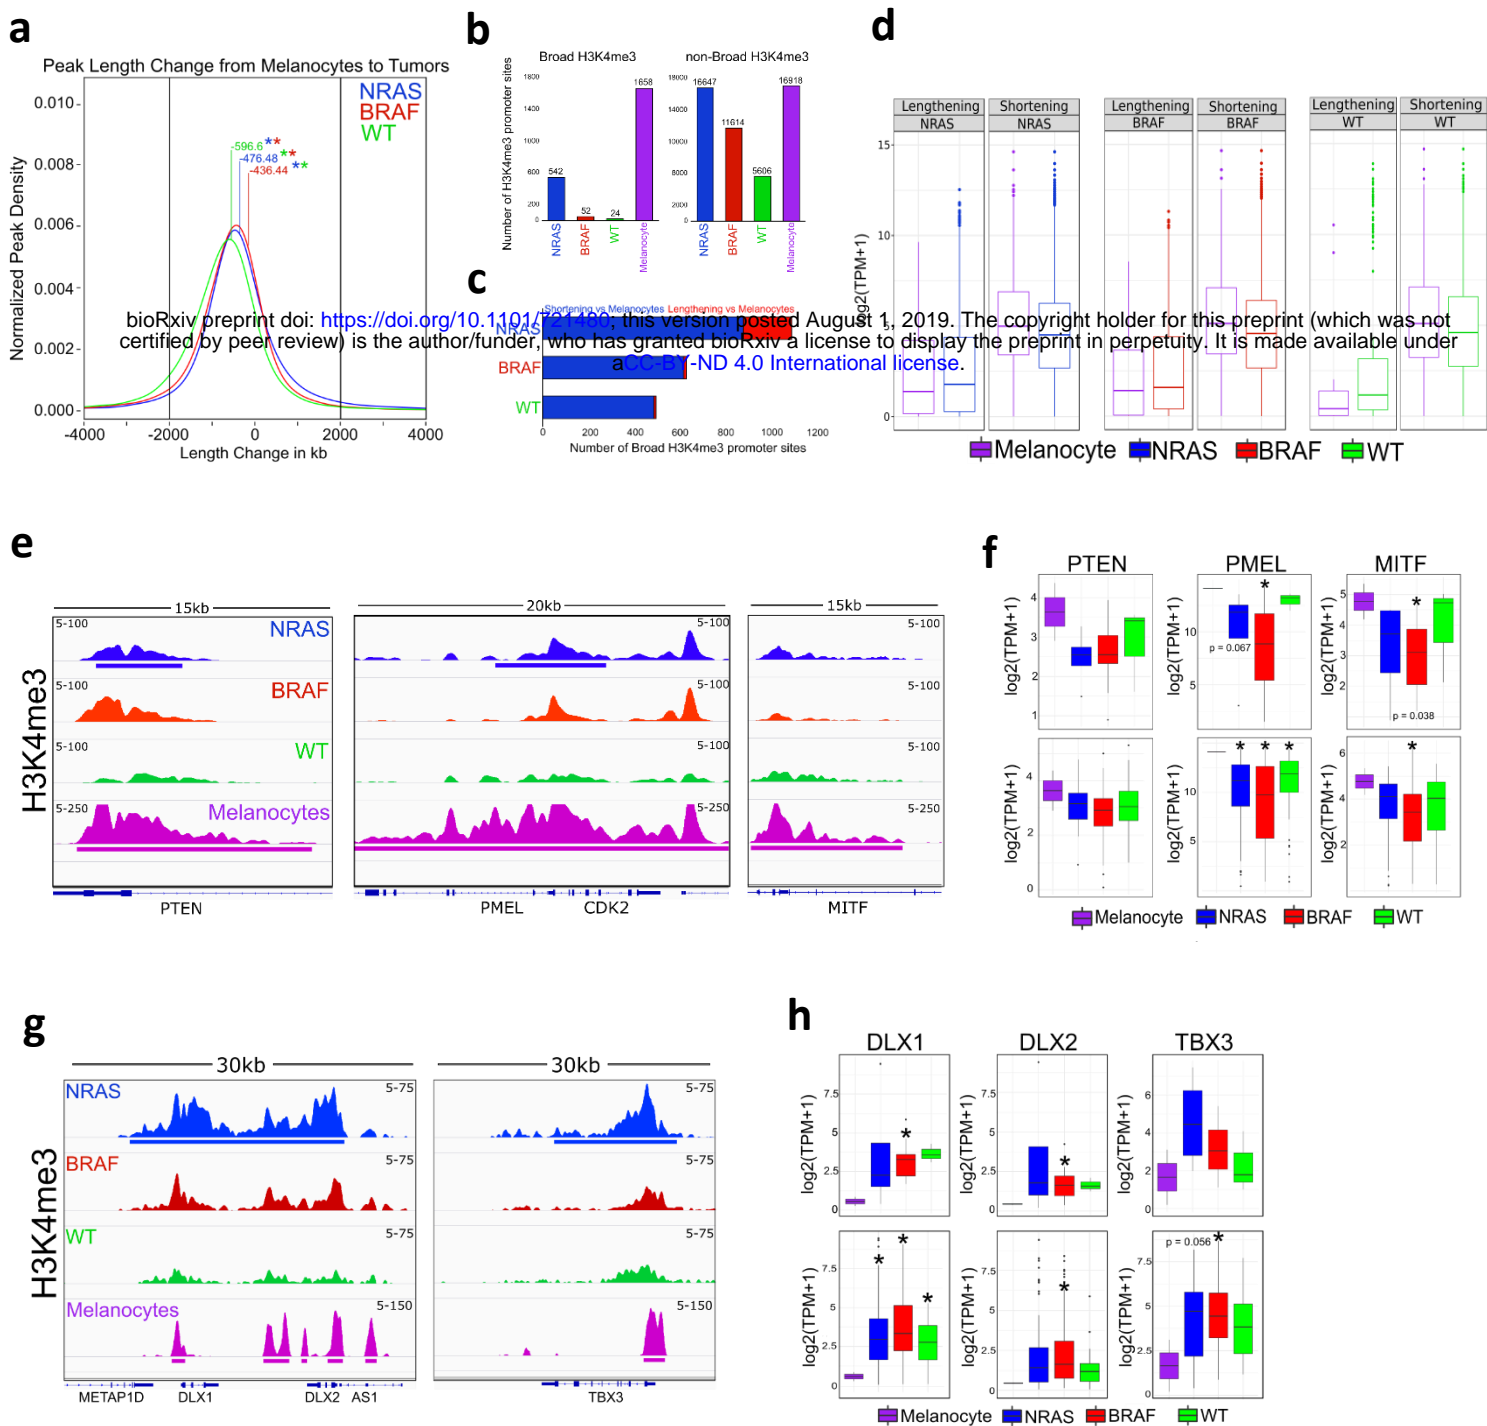

**Figure 5: Broad H3K4me3 domain spreading is associated with increased transcriptional activation.**

a) Kernel density estimation plot displaying H3K4me3 peak length change (-/+2kb) from melanocytes to mutational subtype. Number denotes mean length change in kilobases between melanocytes and melanoma subtype. Asterisk denotes p-value < 1e-50 between melanoma subtype.

b) Barplot of broad and non-broad H3K4me3 promoter associated sites in each mutational subtype.

c) Barplot of broad H3K4me3 promoter associated sites displaying shortening or lengthening (-/+2kb) in melanoma tumors relative to melanocytes.

d) Boxplot displaying quantile normalized mean RNA-seq expression profiles from NRAS (n=81), BRAF (n=118) and WT (n=38) metastatic samples based on genes displaying shortening or lengthening (-/+2kb) in melanoma tumors relative to melanocytes identified in (c).

e) Genome browser view of ChIP-seq tracks displaying H3K4me3 shortening on the *PTEN*, *PMEL* and *MITF* genes in melanoma tumors relative to melanocytes.

f) Boxplot displaying quantile normalized mean RNA-expression profiles (log<sub>2</sub> TPM) of the *PTEN*, *PMEL* and *MITF* genes in melanocytes (n=2) and melanoma tumor subtypes (NRAS=4, BRAF=13, WT=3 (top), NRAS=81, BRAF=118, WT=38 (bottom)). Asterisk denotes p-value < 0.05.

g) Genome browser view of ChIP-seq tracks displaying H3K4me3 lengthening on *DLX1/2* and *TBX3* genes in melanoma tumors relative to melanocytes.

h) Boxplot displaying quantile normalized mean RNA-expression profiles (log<sub>2</sub> TPM) of the *DLX1/2* and *TBX3* genes in melanocytes (n=2) and melanoma tumor subtypes (NRAS=4, BRAF=13, WT=3 (top), NRAS=81, BRAF=118, WT=38 (bottom)). Asterisk denotes p-value < 0.05.

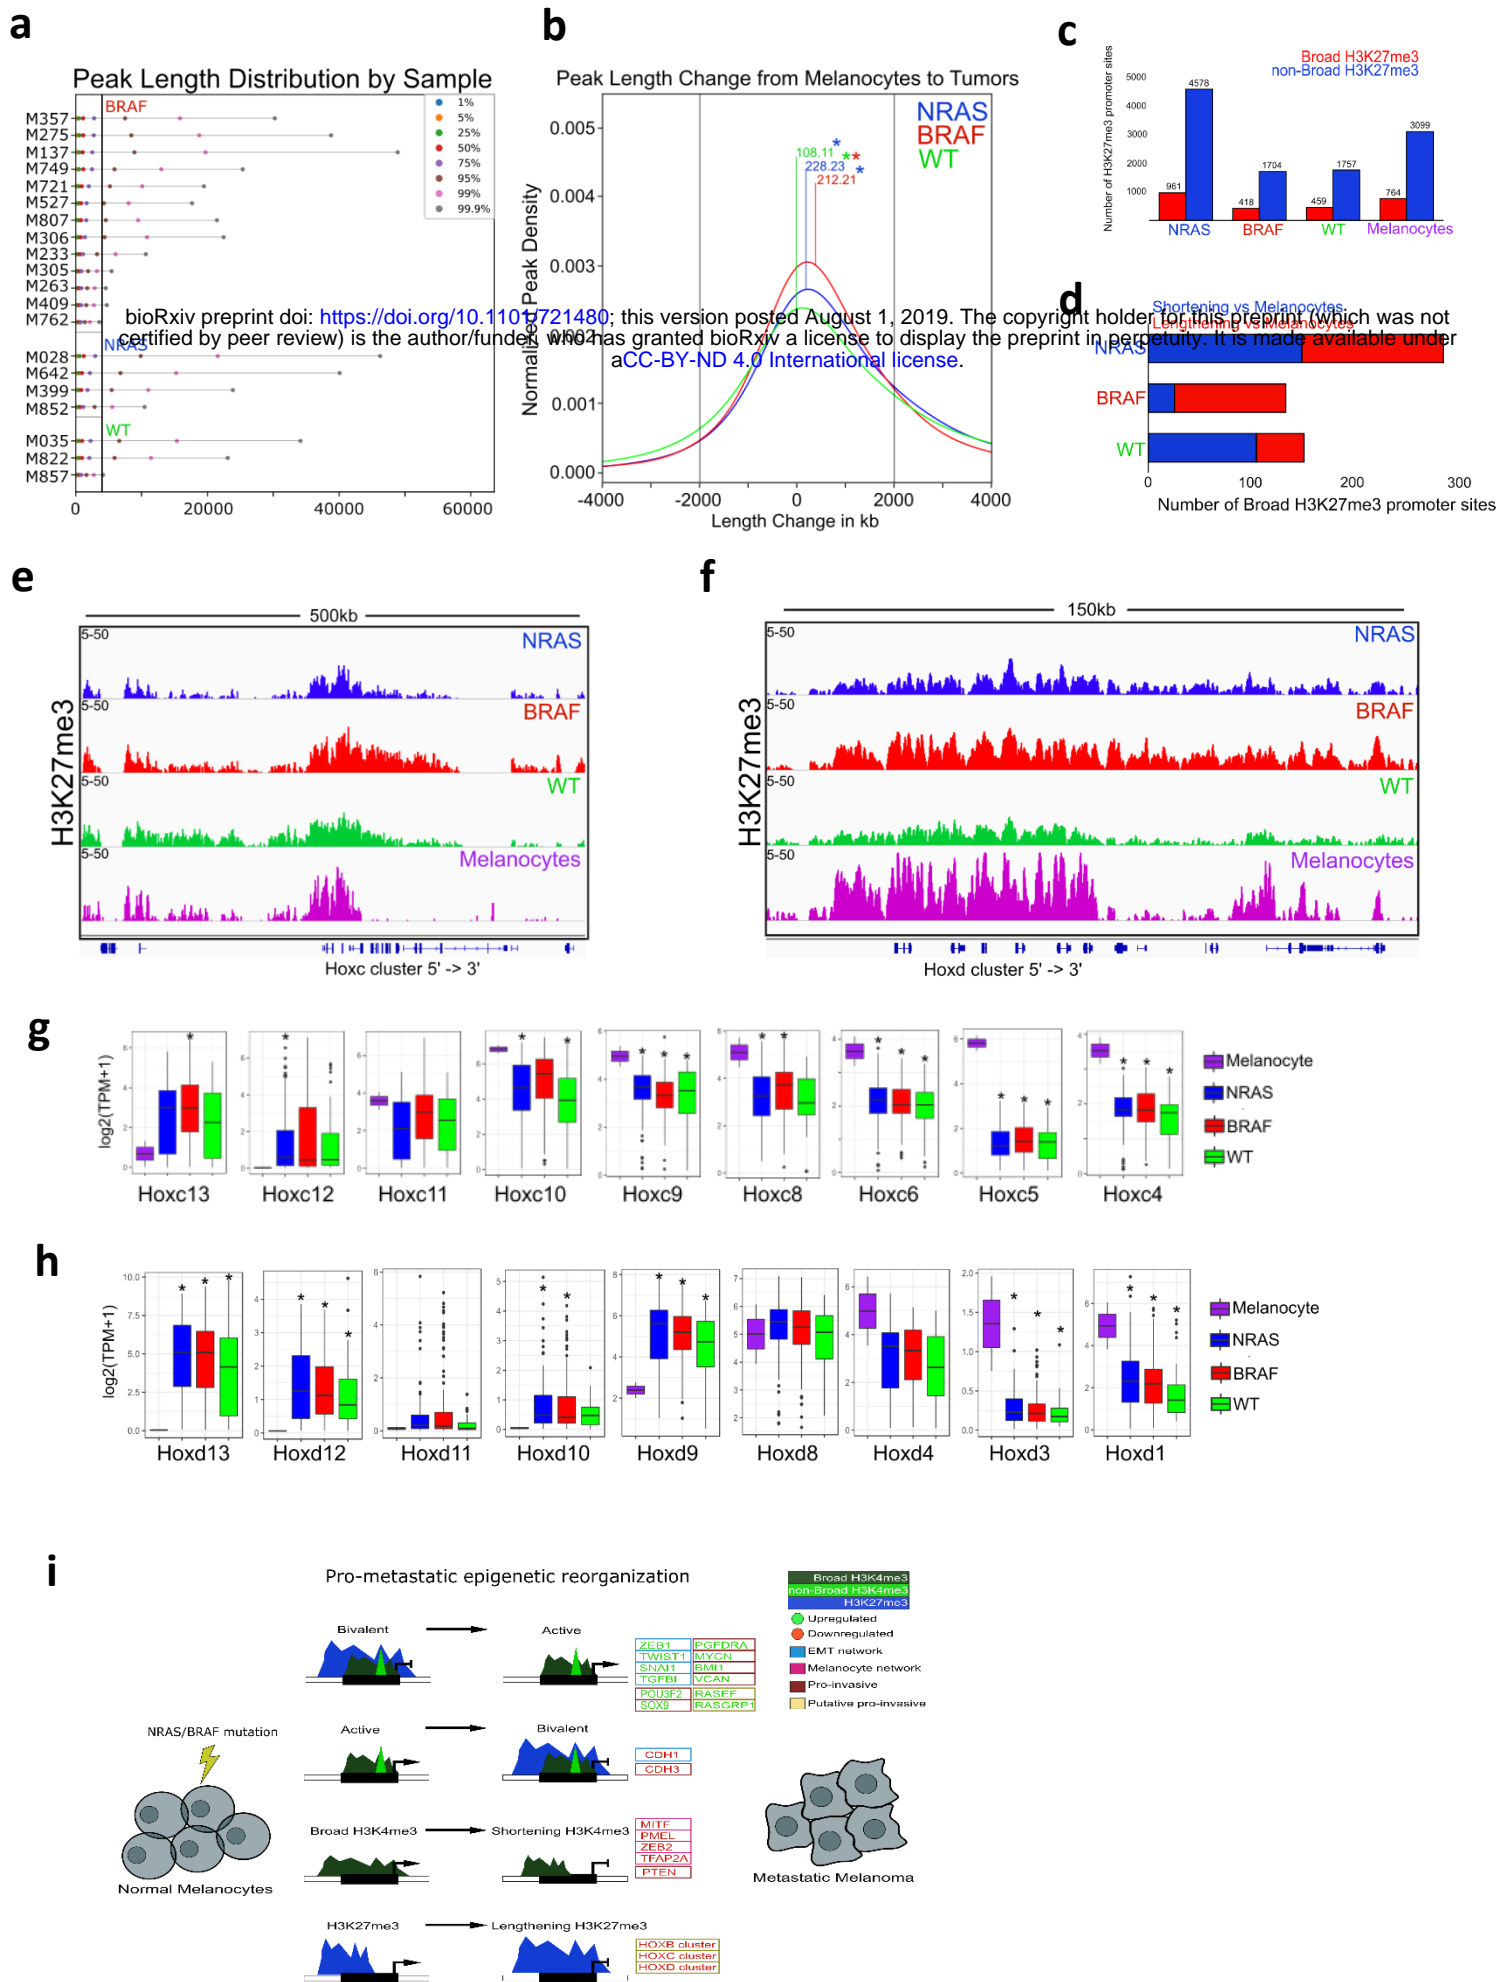

**Figure 6: Broad H3K27me3 domains display preferential lengthening in metastatic melanoma.**

a) Quartile plot displaying peak length distribution based on percentage of broadest H3K27me3 domains in melanoma tumors. Black line denotes 4kb peak length.

b) Kernel density estimation plot displaying H3K27me3 peak length change (-/+2kb) from melanocytes to mutational subtype. Number denotes mean length change in kilobases between melanocytes and melanoma subtype. Asterisk denotes p-value < 1e-15 between melanoma subtypes.

c) Barplot of broad (>4kb) and non-broad (<4kb) H3K27me3 promoter associated sites in each mutational subtype.

d) Barplot of broad H3K27me3 promoter associated sites displaying shortening or lengthening (>10kb) in melanoma tumors relative to melanocytes.

e) Genome browser views of ChIP-seq tracks displaying exceptionally wide H3K27me3 lengthening from the 5' to 3' end on HOXC cluster genes in BRAF mutational subtypes.

f) Genome browser views of ChIP-seq tracks displaying exceptionally wide H3K27me3 lengthening from the 5' to 3' end on HOXD cluster genes in NRAS mutational subtypes.

g) Boxplot displaying quantile normalized mean RNA-expression profiles (log2 TPM) of all HOXC cluster genes in melanocytes (n=2) and melanoma tumor subtypes (NRAS=81, BRAF=118, WT=38). Asterisk denotes p-value < 0.05.

h) Boxplot displaying quantile normalized mean RNA-expression profiles (log2 TPM) of all HOXD cluster genes in melanocytes (n=2) and melanoma tumor subtypes (NRAS=81, BRAF=118, WT=38). Asterisk denotes p-value < 0.05.

i) Model for potential mechanism in which bivalent switches, the shortening of H3K4me3 domains and lengthening of H3K27me3 domains facilitate the reorganization of an interconnected regulatory network encompassing EMT-TF, melanocyte master regulators and mesenchymal/invasive genes to promote melanoma metastasis
